# Supplementary material for: Geosphere Coupling and Hydrothermal Anomalies before the 2009 Mw 6.3 L'Aquila Earthquake in Italy
Source: Copernicus journal article supplement (doi:10.5194/nhess-2015-346), 2016-02-08
Supplement: Supplementary file [file nhess-2015-346-AC2-supplement.pdf]

1 **Geosphere Coupling and Hydrothermal Anomalies before the 2009 Mw 6.3**  
2 **L'Aquila Earthquake in Italy**

3 L.X. Wu<sup>1,5\*</sup>, S. Zheng<sup>2</sup>, A. De Santis<sup>3</sup>, K. Qin<sup>1</sup>, R. Di Mauro<sup>4</sup>, S.J. Liu<sup>5</sup> and M. L.  
4 Rainone<sup>4</sup>

5 *1 School of Environment Science and Spatial Informatics, China University of Mining*  
6 *and Technology, Xuzhou, China*

7 *2 Academy of Disaster Reduction & Emergency Management, Beijing Normal*  
8 *University, Beijing, China*

9 *3 Istituto Nazionale di Geofisica e Vulcanologia, Sezione Roma 2, Roma, Italy*

10 *4 Dipartimento di Ingegneria e Geologia, Chieti University, V. Vestini 31, 66013 Chieti*  
11 *Scalo, Italy*

12 *5 Northeast University, Shenyang, China*

13 \*Corresponding author: Lixin Wu,

14 School of Environment Science and Spatial Informatics, China University of Mining  
15 and Technology, Xuzhou, China;

16 Email: [awulixin@263.net](mailto:awulixin@263.net), [wlx@cumt.edu.cn](mailto:wlx@cumt.edu.cn)

17 **Abstract:** The earthquake anomalies associated with the April 6, 2009 Mw 6.3  
18 L'Aquila earthquake have been widely reported. Nevertheless, the reported anomalies  
19 have not been so far synergically analyzed to interpret or prove the potential  
20 lithosphere-coversphere-atmosphere coupling process. Previous studies on *b*-value (a  
21 seismicity parameter from Gutenberg–Richter law) are also insufficient. In this work,  
22 the spatio-temporal evolution of several hydrothermal parameters related to the  
23 coversphere and atmosphere, including soil moisture, soil temperature, near-surface air  
24 temperature, and precipitable water, was comprehensively investigated. Air  
25 temperature and atmospheric aerosol were also statistically analyzed in time series with  
26 ground observations. An abnormal enhancement of aerosol occurred on March 30, 2009  
27 and thus proved quasi-synchronous anomalies among the hydrothermal parameters  
28 from March 29 to 31 in particular places geo-related to tectonic thrusts and local  
29 topography. The three-dimensional (3D) visualization analysis of *b*-value revealed that  
30 regional stress accumulated to a high level, particularly in the L'Aquila basin and  
31 around regional large thrusts. Finally, the coupling effects of geospheres were discussed,  
32 and a conceptual LCA coupling mode was proposed to interpret the possible  
33 mechanisms of the multiple quasi-synchronous anomalies preceding the L'Aquila  
34 earthquake. Results indicate that CO<sub>2</sub>-rich fluids in deep crust might have played a

35 significant role in the local LCA coupling process.

## 36 **1. Introduction**

37 The thermal anomalies occurring before large and hazardous earthquakes have been  
38 extensively observed from satellites or on the Earth's surface. In particular, several  
39 thermal parameters, including thermal infrared radiation (TIR) [Tronin et al., 2002;  
40 Saraf and Choudhury, 2004], surface latent heat flux [Dey and Singh, 2003; Qin et al.,  
41 2012, 2014a], and outgoing longwave radiation [Ouzounov et al., 2007; Jing et al.,  
42 2012], have been proven to be related to tectonic seismic activities. With the  
43 development of Earth observation technologies and anomaly recognition methods [e.g.,  
44 Wu et al., 2012; Qin et al., 2013], non-thermal anomalous variations in geochemical  
45 and electromagnetic signals from different spheres of the Earth may indicate complex  
46 geosphere coupling effects during the slow preparation phase of earthquakes. During  
47 the past decades, several mechanisms or hypotheses for interpreting thermal anomalies  
48 have been proposed; examples include the positive hole (P-hole) effect [Freund, 2011],  
49 transient electric field [Liperovsky et al., 2008], frictional heat of faults [Geng et al.,  
50 1998; Wu et al., 2006], and the greenhouse effect caused by Earth degassing [Tronin et  
51 al., 2002]. A unified lithosphere–atmosphere–ionosphere coupling model was proposed  
52 to explain the inherent links among different parameters [Liperovsky et al., 2008a;  
53 Pulinets and Ouzounov, 2011; Pulinets, 2012]. This model has been verified by several  
54 case studies on the spatio-temporal features of the anomalies of multiple parameters  
55 [Pulinets et al., 2006; Zheng et al., 2014]. Wu et al. [2012] emphasized not only the  
56 effect of the coversphere (including water bodies, soil/sand layers, deserts, and  
57 vegetation on the Earth's surface) on pre-earthquake anomalies but also the importance  
58 of this transition layer from the lithosphere to the atmosphere. The coversphere  
59 performs the vital functions of producing observable signals and enlarging or reducing  
60 the transmission of electric, magnetic, electromagnetic, and thermal signals from the  
61 lithosphere to the atmosphere, and even to satellite sensors. Although the existence of  
62 many diagnostic precursors, such as crustal strain, seismic velocity, hydrological  
63 change, gas emission and electromagnetic signals, and their usefulness for earthquake

64 forecasting is still controversial [Cicerone et al 2009; Jordan et al 2011]. With the  
65 abundant data such provided by Global Earth Observation System of System (GEOSS),  
66 multiple parameters from the integrated Earth observation should be encouraged to test  
67 for earthquake anomaly recognition and advance knowledge of precursor signals. The  
68 2009 Mw6.3 L'Aquila earthquake may provide an ideal opportunity for us to further  
69 cognize various change of observational signals in geosphere system and understand  
70 their possible link with geophysical survey.

71 A Mw 6.3 earthquake struck the Abruzzi region in central Italy on April 6, 2009 (01:32  
72 UTC), and its epicenter was located at 42.34°N/13.38°E (depth of 9.5 km), which was  
73 near the city of L'Aquila (Fig.1). According to the Istituto Nazionale di Geofisica e  
74 Vulcanologia (INGV), many strong foreshocks had been occurring since December  
75 2008, and more than 10,000 aftershocks had been recorded until September 2010.  
76 Previous geological studies stated that the present-day geologic setting along the Italian  
77 peninsula related to the N-S convergence zone between the African and the Eurasian  
78 plates is particularly complex because different processes occur simultaneously and in  
79 close proximity [Montone et al., 2004; Galadini et al., 2000]. Central Italy experiences  
80 active NE-SW extensional tectonics approximately perpendicular to the Apenninic fold  
81 and thrust belt [Montone et al., 2012]; a city in this region is L'Aquila, which is bounded  
82 by the *Olevano–Antrodoco* and *Gran Sasso* thrusts at the west and north sides,  
83 respectively. In 2009, the L'Aquila main shock occurred as a result of normal faulting  
84 (*Paganica* fault, PF) and as a primary response to the Tyrrhenian basin opening faster  
85 than the compression between the Eurasian and African plates [USGS, 2009].

86 A large number of the precursory anomalies of the 2009 L'Aquila earthquake were  
87 reported after the main shock. These anomalous parameters included thermal properties,  
88 electric and magnetic fields, gas emissions, and seismicity [Akhoondzadeh et al., 2010;  
89 Bonfanti et al., 2012; Cianchini et al., 2012; De Santis et al., 2011; Eftaxias et al., 2009;  
90 Genzano et al., 2009; Gregori et al., 2010; Lisi et al., 2010; Papadopoulos et al., 2010;  
91 Pergola et al., 2010; Piroddi and Ranieri, 2012; Plastino et al., 2010; Pulinets et al.,  
92 2010; Rozhnoi et al., 2009; Tsolis and Xenos, 2010]. Many of the existing reports  
93 revealed the existence of temporal quasi-synchronism among the several anomalies of

94 different parameters related to different geospheres (Table 1). We believe that the  
95 geosphere coupling effects could support or interpret the occurrence of the various  
96 precursory anomalies of the 2009 L'Aquila earthquake. Moreover, we hypothesize the  
97 possible role of the coversphere in the process of lithosphere–coversphere–atmosphere  
98 (LCA) coupling, in which the radiation transmission caused anomalous thermal infrared  
99 signals in satellite sensors.

100 Air ionization and ion hydration are generally known as critical physical processes that  
101 result in different types of earthquake precursors between the ground surface and the  
102 lower atmosphere [Pulinets and Ouzounov, 2011; Freund, 2011]. However, a  
103 corresponding observation of complementary parameters related to the coversphere,  
104 such as humidity, water vapor, heat flux, and atmospheric aerosol, is not  
105 comprehensive enough to obtain a plain validation.

106 The seismic  $b$ -value describes the fundamental relationship between the frequency and  
107 the magnitude of earthquakes, which is known as the Gutenberg–Richter law  
108 [Gutenberg and Richter, 1944], and is widely applied in tectonic seismicity studies. The  
109  $b$ -value represents the size distribution of abundant seismic events of small to moderate  
110 magnitudes; it is associated with several physical properties, such as regional stress,  
111 material homogeneity, and temperature gradient [Gulia and Wiemer, 2010; Mogi, 1962;  
112 Schorlemmer et al., 2005; Schorlemmer and Wiemer, 2004, 2005; Tormann et al., 2015;  
113 Urbancic et al., 1992; Warren and Latham, 1970; Wiemer and Wyss, 2002; Wyss and  
114 Wiemer, 2000]. Hence, the  $b$ -value is possibly a proxy of crust stress conditions and  
115 could therefore act as a crude stress meter for seismicity observed in the lithosphere  
116 [Tormann et al., 2014]. Although the time sequence of the  $b$ -value based on  
117 microseismicity data before and after the 2009 L'Aquila earthquake has been analyzed  
118 and has revealed the quasi-synchronous features of the  $b$ -value relative to other  
119 parameters [De Santis et al., 2011], the correlations of various anomalies in the  
120 coversphere and lithosphere remain unclear because of the absence of essential  
121 geospatial analysis. Moreover, various factors directly influence the thermal radiation  
122 signals observed by satellite sensors; these factors include atmosphere properties  
123 (absorption, scattering, and emission of water vapor, as well as aerosol particles),

124 thermal condition of the Earth's surface (meteorological condition, soil moisture and  
125 components, vegetation cover, and surface roughness), and the complex thermal  
126 process of geo-objects. In view of remote sensing physics and the LCA coupling effect,  
127 we have reason to believe that other parameters characterized by the above-mentioned  
128 factors in relation to the coversphere and atmosphere should have presented temporal  
129 quasi-synchronism and spatial consistency with the reported thermal anomalies before  
130 the main shock of the 2009 L'Aquila earthquake.

131 Several hydrothermal parameters related to the coversphere and atmosphere, including  
132 soil water and temperature, precipitable water, air temperature, and atmospheric aerosol,  
133 are comprehensively analyzed in this study to explore the possible coupling effects  
134 preceding the 2009 Mw 6.3 L'Aquila earthquake. The 3D dynamic evolution of the *b*-  
135 value is also analyzed to further investigate the potential correlations of multiple  
136 parameter anomalies related to the coversphere and the dynamics of the lithosphere.  
137 Furthermore, the variation of some parameters after the main shock is analyzed for  
138 comparison. From retrospective analyses of data collected prior to this earthquake, we  
139 finally attempt to discuss the geosphere coupling process and propose a model for  
140 interpreting the coupling effects with the support of previous geophysical researches.

## 141 **2. Analysis of hydrothermal parameters**

### 142 **2.1 Data and method**

143 Four parameters related to the coversphere and atmosphere, namely, volumetric soil  
144 moisture level 1 (SML1) at 0–7 cm below ground level, soil temperature level 1 (STL1)  
145 at 0–7 cm below ground level, near-surface air temperature at a height of 2m (TMP2m),  
146 and precipitable water of the entire atmosphere column (PWATclm), were analyzed in  
147 long-term intervals and within two months before and after the main shock. The six-  
148 hourly values of the SML1 and STL1 parameters were 00:00, 06:00, 12:00, and 18:00  
149 every day according to ERA-Interim reanalysis dataset, which is a series of the latest  
150 global atmosphere reanalysis products produced by the European Centre for Medium-  
151 Range Weather Forecasts (ECMWF) to replace the ERA-40. ERA-Interim covers the  
152 data-rich period since 1979 and continues to present time. The gridded data were

153 transformed into a regular N128 Gaussian grid (512 lines of longitude and 256 lines of  
154 latitude) with  $0.71^\circ \times 0.71^\circ$  spatial resolution (<http://apps.ecmwf.int/datasets/data>). The  
155 TMP2m and PWATclm datasets also comprised six-hourly values based on the Final  
156 (FNL) Operational Global Analysis system of the National Center for Environmental  
157 Prediction (NCEP), which was produced with the same NCEP model as that used for  
158 the Global Forecast System (<http://rda.ucar.edu/datasets>). The NCEP-FNL data were  
159 also represented in a Gaussian grid with  $1^\circ \times 1^\circ$  spatial resolution ( $360^\circ$  longitude by  
160  $181^\circ$  latitude). All the data from March and April 2000-2009 were investigated. The  
161 datasets containing information on the air temperature and aerosol optical depth (AOD)  
162 from ground-based observations were considered and compared with the results from  
163 the assimilation data to verify the key coupling process of the anomalies. The air  
164 temperature data were obtained from the L'Aquila weather station ( $42.22^\circ\text{N}/13.21^\circ\text{E}$ ,  
165 elevation of 680 m, shown as yellow circle in Fig. 1), whereas the AOD data were  
166 obtained from the Roma station ( $41.84^\circ\text{N}/12.65^\circ\text{E}$ , elevation of 130 m, shown as yellow  
167 triangle in Fig. 1) of the Aerosol Robotic Networks (AERONET,  
168 <http://aeronet.gsfc.nasa.gov/>). With respect to the epicenter, the Roma station, which  
169 uses the Cimel Electronique CE318 sunphotometer to measure aerosol optical  
170 properties, is the only nearby station with available data.

171 First, we analyzed the long time series of the SML1, STL1, TMP2m, and PWATclm  
172 data on the epicenter pixel ( $42.34^\circ\text{N}$ ,  $13.38^\circ\text{E}$ , shown as black rectangular boxes in Figs.  
173 2.2-2.5). To compare the data in 2009 with historical data, the mean ( $\mu$ ) and standard  
174 deviation ( $\sigma$ ) were calculated using data from multiple years (2000–2008). Here, an  
175 deviation with overquantity more than  $\mu+1.5\sigma$  threshold was defined as an probable  
176 anomaly for each parameter on the epicenter pixel. For confutation analysis, we also  
177 compared the 2009 data with the data from 2006 (green line in Fig. 2), which is regarded  
178 as a silent year for its seismicity rate ( $\leq 10$  earthquakes with M3+ according to the INGV  
179 catalog for this area). After processing the preliminary data and checking for errors, we  
180 found that the anomalies of multiple parameters were more remarkable at 06:00 UTC  
181 than in other periods. Thus, all the ERA-Interim and NCEP-FNL data at 06:00 UTC  
182 were selected uniformly for information extraction and anomaly recognition. The daily

183 averages and the maximum and minimum values based on the data from the ground-  
184 based stations were analyzed subsequently. In addition, we used the 5<sup>th</sup> and 95<sup>th</sup>  
185 percentile box plots of AOD<sub>532nm</sub> each day to effectively express the variations in the  
186 daily averages and maximum and minimum values as a result of the differences in the  
187 daily data records [Che et al., 2014].

188 Second, the spatial distributions of the SML1, STL1, TMP2m, and PWATclm data were  
189 analyzed. Considering the complex influences and possible uncertainties with regard to  
190 seasons, terrain, weather, and latitude, we obtained the differential images of the  
191 changed parameters ( $\Delta P$ ) by subtracting the 2009 daily value from the means from  
192 multiple years. The result reflected a normal background, i.e.,

$$193 \quad \Delta P_t = P_t - \mu_t = P_t - \frac{1}{n} \sum_{i=1}^n P_i \quad (1)$$

194 where  $P_i$  is the daily value of a parameter in 2009 and  $\mu_i$  is the corresponding daily  
195 mean estimated over the years 2000-2008. The  $\Delta P_i$  images on the same day in 2006  
196 were applied for comparison, and the  $P_i$  for 2006 was adjusted to the means of 2000–  
197 2008, except 2006.

## 198 **2.2 Spatio-temporal features of hydrothermal parameters**

### 199 **2.2.1 SML1, STL1, PWATclm, and TMP2m from assimilation datasets**

200 In the coversphere, the soil is an important layer for the transmission of mass and energy  
201 from the lithosphere to the atmosphere. The hydrologic conditions and thermal  
202 properties of soil could be disturbed in the seismogenic process. Our intuitive analysis  
203 showed that the variation curve of the SML1 parameter of the epicenter pixel appeared  
204 to decrease from March to April in 2009 and 2006 (Fig. 2.1a). However, five anomalies  
205 exceeded  $\mu+1.5\sigma$  before the 2009 L'Aquila main shock, with the maximum anomaly  
206 occurring on March 5. In the context of the gradual seasonal increase of STL1, its  
207 anomalous variation became obvious on March 30, with the value being the maximum  
208 for that month (Fig. 2.1b). Although the variation amplitudes of SML1 on March 29  
209 and 31 were less than those of the former two peaks, these dates were quasi-  
210 synchronous with STL1 (Fig. 2.1b). Hence, the water content and temperature in the  
211 soil significantly changed at end of March 2009. Comparing the PWATclm behavior in

212 2009 with its relative stable fluctuation in 2006, which acts as the normal background,  
213 the PWATclm parameter exhibited evident peaks on March 29, 30, and 31; the highest  
214 value reached  $27.8 \text{ kg/m}^2$ , which significantly exceeded  $\mu+2\sigma$  (Fig. 2.1c). PWATclm  
215 represents the total water vapor content of the atmosphere column; in this work, this  
216 parameter indicated that the moisture budgets on the surface and atmosphere layer were  
217 disturbed by something abnormal. Air temperature is a direct parameter related to the  
218 thermal variation in the coversphere. In our study, we also found continuous anomalous  
219 peaks of TMP2m from March 29 to April 1, 2009. The values in this time window  
220 exceeded  $\mu+2\sigma$ , except on April 1 (Fig. 2.1d). Considering the reported anomalies in  
221 Table 1, we propose that the quasi-synchronous period characterized by multiple  
222 parameter anomalies preceding the L'Aquila earthquake is likely the time window from  
223 March 29 to April 1, 2009. The details of the abnormal deviation of the parameters  
224 during this time window are shown in Table 2.

225 We mapped the image series of each  $\Delta P_i$  as the difference between the daily value and  
226 the historical mean ( $\mu$ ) to investigate the spatio-temporal evolution of the investigated  
227 parameters. Figure 2.2a shows that the area with an abnormal increment of  $\Delta\text{SML1}$  was  
228 located in the L'Aquila basin on March 29 and 31, 2009 and that the local  $\Delta\text{SML1}$   
229 reached 19.5 K to 21 K in the epicenter grid. By contrast, the spatial pattern in 2006  
230 was characterized as normal with clear homogeneity for the land in central Italy (Fig.  
231 2.2b). This result implied that the moisture on the upper soil layer of the seismogenic  
232 zone abruptly increased before the main shock. Although significantly anomalous  
233  $\Delta\text{SML1}$  occurred in north Italy, such anomaly was assumed to be unrelated to the  
234 L'Aquila earthquake because of its large area and remote distance. Different from that  
235 of  $\Delta\text{SML1}$ , the spatial anomalous field of  $\Delta\text{STL1}$  initiated on March 29 and appeared  
236 distinguishably northwest to the epicenter of the main shock on March 30, 2009 (Fig.  
237 2.3a), especially along the southern segment of the *Olevano–Antrodoco* thrust (Fig. 1).  
238 This abnormal pattern did not appear in 2006 (Fig. 2.3b). According to the local  
239 meteorological data (Fig. 2.4), the particular spatio-temporal evolution of  $\Delta\text{SML1}$  and  
240  $\Delta\text{STL1}$  did not result from precipitation. As changes in soil water stimulate thermal  
241 change, a short delay in the change in soil temperature relative to soil moisture is



242 possible. In this work, we revealed a one-day delay between the increases in soil  
243 temperature and soil moisture.

244 In the case of an abnormal variation in temperature and moisture in the soil layer,  
245 hydrothermal conversion becomes increasingly significant on the surface and in the  
246 atmosphere because of the wide, open space. Compared with PWATclm in almost all  
247 the Italian territories and surrounding seas during the silent period,  $\Delta$ PWATclm showed  
248 a sudden increase on March 29, 2009; it then quickly dropped to a relatively normal  
249 level on March 31, similar to the case in 2006 (Fig. 2.5). Although the abnormal area  
250 of  $\Delta$ PWATclm covered the entire Italy, a weaker abnormal area appeared in the L'Aquila  
251 basin on March 29-31 and extended to the southeast (Fig. 2.5a), where it equaled  
252  $\Delta$ SML1 on March 29-31 (Fig. 2.3a). We considered the possibility of the regional  
253 anomalous signal related to the seismogenic process being masked by an intensive air-  
254 sea interaction in a large area on those days. Obviously, both the spatial anomalies of  
255  $\Delta$ SML1 and  $\Delta$ PWATclm were not controlled by topographic conditions. Particularly,  
256 the normal spatial pattern of  $\Delta$ TMP2m in central Italy on March 28 to April 1, 2006  
257 was slightly higher than that over the sea and notably lower than that at the northern  
258 border of the Italian territory (Fig. 2.6b). However, an anomalous spatial distribution of  
259  $\Delta$ TMP2m occurred on March 28 and 30, 2009, mainly in the intermountain area  
260 northwest of the main shock epicenter (Fig. 2.6a). The anomalies of the four  
261 investigated parameters were distributed mainly in the L'Aquila basin or in the  
262 intermountain area northeast of the main shock epicenter on March 29-31. Thus, we  
263 inferred that the regional topography (Apennine range and L'Aquila basin) and  
264 tectonics (*Olevano-Antrodoco* and *Gran Sasso* thrusts) in central Italy could have  
265 induced the spatial correlations of these anomalies.

### 266 ***2.2.2 Air temperature and AOD from ground-based stations***

267 To investigate possible thermal fluctuations in situ and to support the potential coupling  
268 effects of such fluctuations on the ground surface, we collected air temperature and  
269 AOD data from ground-based stations. Figure 2.6 shows that the daily averages and the  
270 maximum and minimum values of air temperature at the L'Aquila weather station

271 reached their peaks on March 29 and 30, 2009 (Fig. 2.7). Figure 2.8 shows the AOD  
272 variations that fluctuated in three time windows of the abrupt AOD increase on March  
273 16, 30, and April 3–6, 2009. The dates in which the anomalous values of air temperature  
274 and AOD were observed were consistent with those for SML1, STL1, PWATclm, and  
275 TMP2m. In particular, the general AOD values were less than 0.3 (Fig. 2.8a); however,  
276 the maximum AOD<sub>532nm</sub> reached 0.37, 0.3, and 0.46 in the three time windows, whereas  
277 the rest of the AOD<sub>532nm</sub> varied around 0.07–0.26, which is the same as those on clear  
278 days (Fig. 2.8b). Although the Roma station of AERONET is far from the epicenter and  
279 the increase in AOD was weak, the observed AOD data somehow served as the  
280 reference value for L'Aquila. The secondary organic aerosol (SOA) in the atmosphere  
281 is generated from the photochemical reaction of gas phase precursors, such as sulfur  
282 (SO<sub>2</sub>) and nitrogen (NO<sub>2</sub>) volatiles, as well as ozone (O<sub>3</sub>) [Janson et al., 2001; Rickard  
283 et al., 2010], whereas the photochemical production of O<sub>3</sub> is a result of the photo-  
284 oxidation of methane (CH<sub>4</sub>) and carbon monoxide (CO) [Dentener et al., 2006; Crutzen,  
285 1974]. The increased CH<sub>4</sub> degassing soon after the L'Aquila earthquake [Voltattorni et  
286 al., 2012; Quattrocchi et al., 2011] could be hints of O<sub>3</sub> precursors. Hence, the  
287 anomalous increments of aerosol might have been caused by the formation of SOA  
288 particulates as a result of the photochemical production of O<sub>3</sub> from degassed CH<sub>4</sub>. In  
289 addition, the low precipitation in March 2009 (Fig. 2.4) indicated that the weather  
290 condition during this period was acceptable and that the anomalous PWATclm  
291 increment in the epicenter pixel on March 29, 2009 was not caused by rainfall.

### 292 **2.3 Summary of the hydrothermal parameter analysis**

293 The following seismic anomalies were determined to be possible according to the quasi-  
294 synchronism analysis of the abnormal changes of six hydrologic and thermal  
295 parameters related to the coversphere and atmosphere and according to the spatial  
296 evolution analysis of the images of the changed values. 1) The anomalies were observed  
297 mainly in the L'Aquila basin southeast of the main shock epicenter ( $\Delta$ SML1 and  
298  $\Delta$ PWATclm) or in the Apennines range northwest of the main shock epicenter ( $\Delta$ STL1  
299 and  $\Delta$ TMP2m). 2) The spatial migration of the hydrologic and thermal changes in the

300 upper soil layer ( $\Delta SML1$  and  $\Delta STL1$ ) could have indicated the reformation and  
301 redistribution of mass and energy transmitted from the lithosphere to the coversphere.  
302 3) The spatial distribution of the increased air temperature near the surface was  
303 consistent with that of the soil temperature. Hence, the thermal transmission process  
304 was stable from the coversphere to the atmosphere and was controlled by regional  
305 tectonics in central Italy. 4) Although the improvement in the precipitable water content  
306 in the atmosphere on March 29, 2009 was masked by its high values in the surrounding  
307 large area, the anomalous weak values in the L'Aquila basin suggested that the water  
308 in gaseous or liquid state was influenced by the soil structure (aquifers) and surface  
309 topography. Considering these findings, we propose that the anomalies be interpreted  
310 as the geosphere coupling effects preceding the 2009 L'Aquila earthquake.

### 311 **3. Seismic *b*-value**

#### 312 **3.1 Data and method**

313 The earthquake catalog for computing the *b*-value in this work was obtained from INGV  
314 (ISIDE: <http://iside.rm.ingv.it>). This catalog covers all of Italy and its surrounding  
315 regions. We analyzed the seismic data covering the periods from April 16, 2005 to  
316 December 19, 2012, during which 94,953 events were recorded. Considering data  
317 quality and tectonic regimes related to the 2009 L'Aquila earthquake, we excluded in  
318 the analysis the events that occurred at a depth of over 40 km and limited the study area  
319 to the region within the 80 km radius of the epicenter of the L'Aquila main shock.  
320 Referring to the changes in the slope of the plot of the cumulative number of events,  
321 we identified three-staged phases of different recording qualities, with P1-1 and P1-2  
322 denoting the conditions before the 2009 L'Aquila earthquake and P2 denoting the  
323 conditions after the 2009 L'Aquila earthquake. The details are as follows.

324 Phase P1-1: 3,552 events from April 18, 2005 to August 15, 2007;

325 Phase P1-2: 2,742 events from August 16, 2007 to April 5, 2009;

326 Phase P2: 19,782 events from April 6, 2009 to November 30, 2009;

327 In seismology, the classical Gutenberg–Richter law [Gutenberg and Richter, 1944] is  
328 introduced as follows:

329 
$$\text{Log}N(M) = a - bM \quad (2)$$

330 where  $N$  is the number of earthquakes with magnitudes greater than or equal to  $M$  in a  
 331 given region and in a time interval;  $a$  and  $b$  are constants that describe the productivity  
 332 and relative size distribution of the area of concern, respectively. The study of the  $b$ -  
 333 value has been widely performed [Mogi, 1962; Urbancic et al., 1992; Warren and  
 334 Latham, 1970], and its variations have been found to be caused by regional stress,  
 335 material properties, and temperature gradient. Using the software package ZMAP  
 336 [Wiemer, 2001], we computed the maximum-likelihood  $b$ -values with the following Eq.  
 337 (3):

338 
$$b = \frac{\log e}{\bar{M} - M_o + \frac{\Delta M}{2}} \quad (3)$$

339 where  $\bar{M}$  is the mean magnitude and  $M_o$  is the minimal magnitude of the given sample;  
 340  $\Delta M$  is the uncertainty in magnitude estimation and is usually set to 0.1. The sample was  
 341 considered complete down to the minimal magnitude  $M_c \leq M_o$ , which also referred to  
 342 as the magnitude of completeness [Schorlemmer and Wiemer, 2004].

343 To detect the dynamic features of the  $b$ -values, we estimated the  $b$ -values with Eq. (3)  
 344 in moving (partly overlapping) time windows. Generally, the sampling window  
 345 contains 200 seismic events, 10% of which is the sliding/overlap window (i.e., 20  
 346 events),  $b$ -value actually is estimated from part samples before and after each time node.  
 347 To visualize the spatial distribution of the  $b$ -values, all events in the study area were  
 348 projected onto a coordinate plane with a gridded space of  $0.1^\circ$  longitude by  $0.1^\circ$  latitude.  
 349 At each grid node, we sampled all the events within a radius of 20 km and determined  
 350 their  $b$ -values if at least  $N_{\min} = 30$  events were available. Following the work of De  
 351 Santis et al. [2011], we also calculated the corresponding Shannon entropy of the  
 352 earthquake related to the  $b$ -value, i.e.,

353 
$$H(t) = k - \log b(t) \quad (k \approx 0.072) \quad (4)$$

354 This entropic quantity allows the measurement of the level of disorder of the seismic  
 355 system and the missing information or uncertainty because it is universally considered  
 356 a fundamental macroscopic physical quantity that describes the properties of complex

357 geosystemic evolutions, such as that of the seismogenic system in the lithosphere [De  
358 Santis et al., 2011].

### 359 **3.2 Spatio-temporal features**

360 To compare the results of De Santis et al. [2011], we also reduced the catalog by  $M_c =$   
361 1.4 for the time series analysis of the  $b$ -values from phase P1-2 to phase P2. Following  
362 the initial stable phase in 2008, the  $b$ -value drastically decreased as the main shock  
363 approaching. Figure 3.1 shows that the curve drops to the lowest point of  $b = 0.747$   
364 about March 27, 2009, i.e.,  $\sim 10$  days before the main shock or a few days before the  
365 occurrence of various thermal anomalies [Piroddi and Ranieri, 2012; Piroddi et al.,  
366 2014]. Meanwhile, the entropy gradually increased to reach the peak (almost 0.2, Fig.  
367 3.1) during the same period after a long (almost) stable period and then dropped one  
368 week before the main shock. Note that the exact time when the peaks were reached  
369 (minimal  $b$ -value and maximal entropy) could not be detected properly because ZMAP  
370 applies a moving sliding window containing 200 events for computation. Hence, each  
371 curve was slightly affected by what was preceding and what was following the given  
372 moment of estimation. Moreover, the  $b$ -value (or the entropy) appeared to have moved  
373 rapidly to the minimum (or the maximum) on the day of the main shock. This condition  
374 indicated that the regional stress was rapidly released and that faults ruptured quickly  
375 close to the main shock. Both the  $b$ -value and entropy were unstable after the main  
376 shock because of the aftershocks. Although we used a moving window with ZMAP to  
377 calculate the  $b$ -value, and, in turn, the entropy, the minimum value of  $b$ -value and the  
378 maximum value of the entropy just around the time of the mainshock is real and not an  
379 artefact. Fig. 3.2 shows a smaller interval of time where the entropy has been estimated  
380 in subsequent non-overlapping intervals of 30 seismic events each: it is clear from the  
381 observed estimates (triangles) the beginning of the increase of the entropy well before  
382 the mainshock (when the entropy exceeds two times the standard deviation,  $\sigma$ ,  
383 estimated over the whole interval), with maximum at around the moment of it (when  
384 the entropy exceeds even ten times the standard deviation). For a better visualization of  
385 the observed general behaviour of the entropy, we also draw the gray curve that defines

386 a reasonable smoothing of the entropy values: 15-point FFT (Fast Fourier Transform)  
387 before the mainshock and 50-point FFT smoothing after the mainshock. The different  
388 kind of smoothing is related to the different rate of seismicity before and after the  
389 mainshock.

390 Then we split the catalog into two subsets in terms of their magnitudes, which were  
391 lower than the estimated completeness values, i.e.,  $M_c = 1.2$  and  $M_c = 1.0$ . The spatial  
392 distributions of the  $b$ -values clearly differed in the two phases before the L'Aquila  
393 earthquake (Fig. 3.3b and d). In phase P1-1, the  $b$  values in the L'Aquila basin and its  
394 surroundings were about 1.0, which indicated a normal regional stress level because  $b$   
395 = 1.0 is a universal constant for earthquakes in general [Schorlemmer et al., 2005;  
396 Kagan, 1999]. The anomalous areas of high  $b$ -values ( $b \geq 1.2$ ) were located in the south  
397 and east of the impending L'Aquila hypocenter. By contrast, some external areas with  
398 low  $b$ -values were not relevant to the seismic sequence because of existing rare  
399 hypocenters (Fig. 3.3a). However, most of the relative high  $b$ -values in phase P1-1  
400 changed to extremely low  $b$ -values ( $b \leq 0.8$ ) in phase P1-2. In particular, a relatively  
401 homogeneous strip of low  $b$ -values extended westward from the hypocenter and crossed  
402 the southern segment of the *Olevano–Antrodoco* thrust. This effect indicated the  
403 development of rock mass fracturing in the east-to-west direction, especially in the  
404 south of the impending hypocenter. Coincidentally, this strip representing a high stress  
405 level was consistent with the location of the strongest variation in soil temperature on  
406 March 30 (Fig. 2.3a). Most of the other parts along the *Olevano–Antrodoco* and *Gran*  
407 *Sasso* thrusts retained relatively high stress levels, which implied low seismicity. The  
408 changed spatial patterns of the  $b$ -values from P1-1 to P1-2 indicated the adjustment of  
409 the regional crust stress to a relatively high level in the seismogenic zone before the  
410 L'Aquila earthquake. These conditions clearly reflected the intensive seismicity and  
411 significantly rapid accumulation of crustal stress occurring near the approaching  
412 L'Aquila main shock hypocenter relative to other places. Figure 3.2f shows the spatial  
413 distribution of the  $b$ -values after the L'Aquila earthquake. Different from that happened  
414 before the main shock, the low  $b$ -values occurred in the L'Aquila basin and its  
415 surroundings because of the fault rupture and the subsequent aftershocks (Fig. 3.3e).

416 We also notice that the extremely low  $b$ -values (red area) covered the entire *Gran Sasso*  
417 thrust and the footwall of the *Olevano–Antrodoco* thrust. This observation indicated  
418 that the developed cracks and ruptured rocks, which resulted from the normal faulting  
419 of the L’Aquila earthquake, passed through the entire *Gran Sasso* thrust but stopped at  
420 the footwall of the *Olevano–Antrodoco* thrust.

421 We also selected the geological section (section 1 in Fig. 3.4a) used by Piroddi et al.  
422 [2014] to show the variations in the  $b$ -values with depth before the L’Aquila earthquake.  
423 Another section of equal length (section 2 in Fig. 3.4a), which was perpendicular to  
424 section 1 crossing the epicenter, was analyzed to identify further the differences in the  
425 stress distribution and rock failure between section 1 and 2. Events above depth = 20  
426 km were sampled to calculate the  $b$ -values in a buffer of 20 km from the two section  
427 lines (Fig. 3.4a). In Fig. 3.4b, the spatial distribution of the low  $b$ -value appeared around  
428 the hypocenter and extended about 25 km to SWW of the hanging wall of the *Paganica*  
429 fault along section 1. This distribution illustrated the stress accumulation at a depth of  
430 10 km, which is shown as a stripe in Fig. 3.3d. A relatively low  $b$ -value zone was  
431 observed between the *Paganica* fault and the *Gran Sasso* thrust. In addition to the area  
432 of the impending hypocenter, the spatial image of the  $b$ -value along section 2 confirmed  
433 that the low  $b$ -value zone was near the *Gran Sasso* thrust and about 20 km from NNW  
434 of the *Olevano–Antrodoco* thrust (Fig. 3.4b). According to this result, the geo-zones of  
435 stress concentration and rock failure were related not only to the normal seismogenic  
436 fault (*Paganica* fault) but also to the two large thrusts (*Olevano–Antrodoco* and *Gran*  
437 *Sasso* thrusts) long before the L’Aquila earthquake. The lowest  $b$ -values centered on  
438 the hanging wall of the *Paganica* fault at depths of 5-15 km (Figs. 3.4b and c). As  
439 shown in the vertical imaging section, the low  $b$ -values partly connected the *Paganica*  
440 fault to the *Gran Sasso* thrust. Moreover, the relations between the  $b$ -values and the  
441 geological depth in the whole study area were mapped to investigate the change in the  
442 stress environment of the deep earth at different phases (Fig. 3.5). We observed a  
443 similar variation trend of the  $b$ -values spatially related with depth before (phase P1-2)  
444 and after (phase P2) the main shock. The general  $b$ -value curves at both phases initially  
445 increased from 20 km to about 12.5 km, rapidly dropped to the minimum at 9.5 km, and

446 finally increased to high values at 5 km, which is the lowest depth indicated in the  
447 hypocenter records. Hence, the regional crust stress accumulated at a depth of about 9.5  
448 km, whereas the stress dropped at the deep and low crusts. The stress change was stable  
449 at a depth of more than 20 km in the study area. Obvious curve reversals appeared twice  
450 at depths of 8–12.5 km before the main shock (Fig.3.5a). Hence, heterogeneous litho-  
451 stratigraphic properties affected rock failure and led to different stress states in the study  
452 area. According to CROP 11 (“CROsta Profonda,” literally “Deep Crust”) studies on  
453 the near-vertical seismic reflection profiles crossing central Italy, which were supported  
454 by The CROP Project and were initiated in the mid-1980s with joint funding from the  
455 National Research Council, AGIP Oil Company, and ENEL (National Electric  
456 Company) [Di Luzio et al., 2009; Patacca et al., 2008; Tozer et al., 2002], the anomalous  
457 curve reversals resulted from the litho-stratigraphic difference among the Mesozoic  
458 *Gran Sasso–Genzana* unit, *Queglia* unit, *Morrone–Porrara* unit, and even the western  
459 *Marsica–Meta* unit. These carbonate units mainly contain shallow-platform dolomite  
460 and limestone, which were overlaid disconformably by Miocene carbonate deposits and  
461 siliciclastic flysch deposits. In addition, the *Queglia* unit and the deeper *Maiella* unit  
462 contain Messinian evaporite and marl. Thus, the anomalous reversal of the *b*-value with  
463 depth could be the result of the unconformable Mesozoic–Cenozoic contact; the mixed  
464 flysch, evaporate, and marl might have also affected the counter-regulation of stress  
465 accumulation. Hence, we infer that  $10 \pm 5$  km was the main depth range of the seismic  
466 stress variation associated with the L’Aquila earthquake.

### 467 **3.3 Summary of the seismic analysis**

468 The time series analysis of the *b*-values in phases P1-2 and P2 shows that after late  
469 December 2008, the *b*-value (or the entropy) rapidly went to the minimum (or the  
470 maximum), specifically on March 27, 2009 (10 days before the main shock), and then  
471 wildly fluctuated closely before and after the main shock. The date of occurrence of the  
472 anomalously low *b*-value coincided with that of the reported thermal anomalies, which  
473 indicated the rapid release of crust stress and fracturing of rock mass and/or faults.  
474 Compared with that in phase P1-1, the image of the *b*-value in the latter phase P1-2



475 showed abnormally low  $b$ -values near the impending L'Aquila hypocenter, as well as a  
476 homogeneous strip of low  $b$ -values extending toward the east-to-east direction and  
477 crossing the southern segment of the *Olevano–Antrodoco* thrust. After the main shock,  
478 the anomalous zone of low  $b$ -values emerged in the L'Aquila basin and its surroundings  
479 because of rupturing and subsequent aftershocks. The 3D spatial variation of the  $b$ -  
480 value showed that the zone of low  $b$ -values obviously appeared around the hanging wall  
481 of the *Paganica* fault at a depth of 5–15 km and extended to 20 km SWW. Similar  
482 anomalies of low  $b$ -values closely related to two large thrusts were also observed in  
483 NNW of the impending hypocenter. In particular, anomalous reversals of the  $b$ -values  
484 occurred twice at a depth of 8-12.5 km before the main shock, thus implying that  
485 unstable stress state did relate to heterogeneous litho-stratigraphic properties. The  
486 revealed spatial pattern of the  $b$ -values indicated that the space evolution characteristics  
487 of the stress accumulation prior to and immediately after the L'Aquila earthquake  
488 reflect the spatial correlations among the L'Aquila earthquake and seismic faults in the  
489 central Apennines.

#### 490 **4. Discussions**

491 As mentioned above, SML1, STL1, TMP2m, PWATclm,  $b$ -value, and even AOD have  
492 quasi-synchronous time windows of anomalies. Obviously, this characteristic is not a  
493 simple coincidence, but its geophysical mechanism necessitates further analysis. Here,  
494 we attempt to provide a possible explanation in view of geosphere coupling.

##### 495 **4.1 Lithosphere: deep fluid and stress**

496 The central Apennines are affected by a NE-SW striking extension and uplift. This  
497 extension was responsible for the formation of intra-mountain basins, i.e., L'Aquila  
498 basin, bounded by the *Gran Sasso* and *Mt. d'Ocre* ranges. During the L'Aquila seismic  
499 sequence, the seismic events were focused on the upper parts of the crust with a depth  
500 < 15 km; three main faults were activated by dip-slip movements in response to the NE-  
501 SW extension [Di Luccio et al., 2010]. The ultimate cause of an earthquake is  
502 undoubtedly the crust stress exceeding the elastic limits of faults or rock mass. Crust  
503 stress is indeed affected by particular geo-environmental conditions, including faults,

504 cracks, rock, and fluids, inside the lithosphere. Some studies based on the measurements  
505 of the ratio of compressional velocity to shear velocity and of seismic anisotropy have  
506 provided evidence that high-pressure fluid contributed to the rupturing of the 2009  
507 L'Aquila earthquake [Di Luccio et al., 2010; Terakawa et al., 2010; Lucente et al., 2010].  
508 The contribution of fluids to the L'Aquila seismic sequence evolution was  
509 independently confirmed by Cianchini et al. [2012] through magnetic measurements  
510 from the L'Aquila geomagnetic observatory. As a result of the eastward migration of  
511 the compressive front since the early Miocene, the back-arc extension affected the  
512 Apennines chain, which was previously controlled by compressive tectonics [Di Luccio  
513 et al., 2010]. Normal faults formed the L'Aquila basin and affected the Apennines chain  
514 in the Pleistocene period [Doglioni, 1995]; moreover, several works have increasingly  
515 implicated fluids and their movement in the generation of the L'Aquila earthquake [Di  
516 Luccio et al., 2010; Terakawa et al., 2010; Lucente et al., 2010]. Both the eastward  
517 compressive and NE-SW extensive stresses could have contributed to the deep fluid  
518 migration to the potential epicenter area. Subsequently, seismogenic faults became  
519 weak as a result of the high pressure of pore fluid and consequently reduced the stress  
520 level needed to break the rocks [Hubbert and Rubey, 1959]. In particular, a proposed  
521 scenario suggested that the *Paganica* fault plane initially acted as a barrier to fluid flow  
522 [Lucente et al., 2010]; hence, the fluid pressures at both sides of the fault were  
523 unbalanced. The foreshock sequence, especially the Ml 4.0 foreshock on March 30,  
524 broke the barrier, thereby allowing fluids to migrate across the fault and change the  
525  $V_p/V_s$  ratios [Lucente et al., 2010]. The migrating fluids would have dilated the rock  
526 mass of the hanging wall and facilitated fault movement, leading to earthquake  
527 nucleation. The images of the  $b$ -values in phase P1-2 (Fig. 3.3d) and along the two  
528 orthogonal sections (Fig. 3.4) clearly show the spatial distribution of the intensive stress  
529 accumulation and rock failure development around the impending hypocenter and the  
530 large thrust at a depth of  $10 \pm 5$  km in the crust, which correspond to fluid migration  
531 and high pore pressure, respectively.

532 At this point, we clarify basic issues on fluids. First, we discuss the composition of  
533 fluids and their sources. The Apennines located at the plate boundary are characterized

534 by high heat flow and large-scale vertical expulsion, volcanoes, gas vents, mud pools,  
535 geysers, and thermal springs, which are typical surface features of fluid expulsion  
536 [Chiodini et al., 2004; Chiodini et al., 2011; Minissale et al., 2004]. Two of the largest  
537 aquifers covering the Abruzzi region are the *Velino* and *Gran Sasso* aquifers (Fig. 4.1b),  
538 which consist of Meso-Cenozoic carbonate formations (limestone and dolomite) of the  
539 Latium–Abruzzi platform and of platform-to-basin transitional domains [Chiodini et al.,  
540 2011]. For the fluid solution, the rich groundwater breeds an ideal geo-zone for gas–  
541 water–rock reactions. Fluids with CO<sub>2</sub>-rich gases are known to be involved in the  
542 earthquake preparation process [Di Luccio et al., 2010; Terakawa et al., 2010; Lucente  
543 et al., 2010; Chiodini et al., 2011]. Both the numerous CO<sub>2</sub>-rich gas emissions mainly  
544 from the Tyrrhenian region and the large amounts of deeply derived CO<sub>2</sub> dissolved by  
545 the groundwater of the aquifers of the Apennines have been supported by geochemical  
546 and isotopic data [Chiodini et al., 2000, 2004, 2011; Minissale et al., 2004]. The melting  
547 of the crust sediments of the subducted Adriatic–Ionian slab is a regional CO<sub>2</sub> source,  
548 and the subsequent upwelling of the mantle and the carbonate rich melts would have  
549 induced the massive degassing of CO<sub>2</sub> on the Earth’s surface [Frezzotti et al., 2009].  
550 Thus, we conclude that the large quantities of CO<sub>2</sub> gas in the two aquifers not only  
551 comprise a large portion of the dissolved inorganic carbon derived from the Tyrrhenian  
552 mantle wedge and/or Adriatic subducted slab in the deep Earth but also involve the  
553 progressive decarbonation of minerals of the carbonate formations in the shallow crust.  
554 Second, we explain how fluids migrate. On the one hand, Chiodini et al. [2011]  
555 compared the geochemical composition of Abruzzi gas and that of 40 large gas emission  
556 sites located in central Italy and found that the former becomes progressively rich in  
557 radiogenic elements (<sup>4</sup>He and <sup>40</sup>Ar) and N<sub>2</sub> from the volcanic complexes in the west to  
558 the Apennines in the east, thereby indicating the increasing residence time of the gas in  
559 the crust moving from west to east. On the other hand, Minissale et al. [2004] performed  
560 a systematic analysis of published geochemical and isotopic data (together with new  
561 data) from the Apennines, including thermal and cold springs, gas vents (mostly CO<sub>2</sub>),  
562 and active and fossil travertine deposits, and found that meteoric water precipitating in  
563 the high eastern Apennine ranges mixes with ascending eastward magmatic,

564 metamorphic, and geothermal fluids in the highly permeable Mesozoic limestone.

#### 565 **4.2 From lithosphere to coversphere: Earth degassing**

566 Before the main shock, CO<sub>2</sub>-rich gases from different sources would have been injected  
567 into the regional groundwater system (i.e., *Velino* and *Gran Sasso* aquifers) and moved  
568 up to the surface. Hence, the influx of CO<sub>2</sub>-rich gases can increase pore pressure and  
569 flow rate. During the foreshock sequence, the development of fractures and cracks of  
570 rock mass would have facilitated the flow of fluids outside the aquifers in the shallow  
571 crust, which is bordered by the *Olevano–Antrodoco* and *Gran Sasso* thrusts. Meanwhile,  
572 electronic charge carriers of crustal rocks in the form of peroxy defects known as p-  
573 holes [Freund, 2011] could have been activated when the rock was stressed.  
574 Overpressured fluid could further reduce the friction of fault planes and reactivate faults.  
575 As a result of the widespread aquifers and the high permeability of carbonate formations,  
576 underground fluids with CO<sub>2</sub>-rich gases easily migrated upward to the coversphere  
577 under the accelerated stress condition. The rising of shallow underground fluid alters  
578 soil physical properties (i.e., soil moisture and temperature) and thereby affects  
579 different components of surface energy balance. A gas geochemical monitoring  
580 conducted in a natural vent close to the L’Aquila basin observed anomalous CO<sub>2</sub> gas  
581 flow variations in March and April 2009 [Bonfanti et al., 2012]. The intensive CO<sub>2</sub>  
582 degassing from ground measurements confirms the emission of deeply originating  
583 gaseous fluids to the coversphere. The increase in greenhouse gas emission (i.e., CO<sub>2</sub>),  
584 is also an important mechanism of pre-earthquake thermal anomalies. In addition, as  
585 radon gas might cause air ionization and variations in humidity and latent heat exchange,  
586 the anomalous Rn emanation before the L’Aquila earthquake was recorded [Pulinets et  
587 al. 2010]. Soil gas surveys [Voltattorni et al., 2012; Quattrocchi et al., 2011] revealed  
588 CO<sub>2</sub> and certain amounts of CH<sub>4</sub> and Rn as released gas phases. Hence, we propose that  
589 the degassing of CO<sub>2</sub>, even CH<sub>4</sub> and Rn, from the lithosphere to the coversphere before  
590 the main shock could have resulted in the complex lithosphere–coversphere coupling  
591 effect, which finally increased near-surface temperature and generated heavy TIR  
592 emissions.

### 593 **4.3 From coversphere to atmosphere: air ionization**

594 As a transition layer from the lithosphere to the atmosphere, the coversphere affects the  
595 flow and exchanges of mass and energy from the deep crust to the surface. As revealed  
596 by the ESA global land cover data produced from the Medium Resolution Imaging  
597 Spectrometer sensor aboard the Envisat satellite, the thermal anomalous zone based on  
598 the Night Thermal Gradient (NTG) algorithm (Fig. 4.1a) was mainly covered by high  
599 vegetation, i.e., broadleaved deciduous forest, with strong water retention and  
600 developed root traits. Generally, high vegetation coverage represents high moisture in  
601 deep soil and improves the active characteristics of surface soil, including organic  
602 matter contents, which promote fluid concentration and movement through preferential  
603 flow and root absorption [Chai et al., 2008; Millikin et al., 1999] Hence, we propose  
604 that high vegetation in central Italy facilitated the upward migration of CO<sub>2</sub>-rich fluids  
605 inside the coversphere before the 2009 L'Aquila earthquake. We also suggest that this  
606 upward migration of CO<sub>2</sub>-rich fluids generated heavy thermal radiations because  
607 surface temperature rise results from possible greenhouse effects together with latent  
608 heat release stimulated by the decay of radon and/or the activation of P-holes.

609 Air ionization is a fundamental factor of energy balance in the lower atmosphere. When  
610 underground gases are released on the surface, the air composition of the lower  
611 atmosphere must change. The leaked CO<sub>2</sub> and CH<sub>4</sub> gases on the surface can serve as  
612 radon carriers, and  $\alpha$ -particles emitted by a certain amount of decayed radon can further  
613 motivate the air ionization process [Pulinets and Ouzounov, 2011]. In addition, the  
614 activated p-hole outflow leads to air ionization at the ground–air interface [Freund,  
615 2011]. Hence, both radon emanation and P-hole activation processes could have  
616 contributed to the air ionization and resulting ion hydration before the 2009 L'Aquila  
617 earthquake. The direct results of ion hydration are humidity change and latent heat  
618 release. In turn, increased latent heat changes the content of water vapor. In this work,  
619 the local greenhouse effect and latent heat release jointly resulted in the increase in air  
620 temperature, and TIR anomalies (i.e., NTG) were observed by satellite sensors before  
621 the 2009 L'Aquila earthquake. Ion hydration in the air requires particulate matter as  
622 water condensation nucleus after air ionization; hence, aerosol particle injection (AOD

623 increase) is theoretically necessary [Qin et al., 2014b].

624 Although rock failure developed mainly in the hypocenter area and related to normal  
625 faulting, the *b*-value features of the thrusts in the wing of the *Paganica* fault indicate  
626 that NTG thermal anomalies are indeed related to compressive stress. The hypocenter  
627 area is bounded by two intersecting thrusts, with the *Olevano–Antrodoco* thrust being  
628 the main one. The experimental TIR observations on the fracturing of loaded intersected  
629 faults revealed the close relationship between the changed TIR radiation and the  
630 geometrical structure of intersected faults, with abnormal TIR spots usually occurring  
631 along the main fault [Wu et al., 2004, 2006]. In addition, two separate zones of surface  
632 NTG anomalies (Fig. 4.1a) could have different modes from deeper thermal sources.

633 Therefore, a particular LCA coupling mode is proposed to interpret the comprehensive  
634 geophysical mechanisms of multi-parameter anomalies associated with the 2009  
635 L’Aquila earthquake. Before the main shock, the deep CO<sub>2</sub>-rich fluids changed the geo-  
636 environment in the lithosphere, including the geophysical properties of rock mass, the  
637 chemical composition of groundwater, and fault activity. Thus, the resulting intensive  
638 crust stress varied in the specific area, particularly in the southern segment of the  
639 *Olevano–Antrodoco* thrust. Forced by the resulting intensive stress and driven by high-  
640 pressure fluids, abnormal gas matters (including CO<sub>2</sub>, CH<sub>4</sub>, and Rn) and heat energy  
641 moved up to the coversphere and altered the water content and temperature in the soil  
642 layer (i.e., SML1 and STL1). Furthermore, soil and vegetation facilitated the upward  
643 migration of CO<sub>2</sub>-rich fluids to the atmosphere. In general, a chain of LCA coupling  
644 effects related to the L’Aquila earthquake occurred as 1) the upwelling of underground  
645 fluids increased the soil temperature (STL1) and moisture (SML1); 2) the decay of  
646 radon and the activation of P-holes led to air ionization; 3) the triggering of air  
647 ionization and subsequent ion hydration were promoted by aerosol particle injection; 4)  
648 a series variation occurred in water and heat, including a drop in atmospheric relative  
649 humidity, latent heat release, and change in water vapor (i.e., PWATclm); 5) air  
650 temperature increased (i.e., TMP2m); and 6) TIR anomalies (i.e., NTG) were observed  
651 from the satellite sensors.

## 652 5. Conclusions

653 The anomalies of hydrothermal parameters in the coversphere and atmosphere before  
654 the 2009 L'Aquila earthquake appeared in significant quasi-synchronous time windows  
655 on March 29-31, 2009 (three days). The spatial patterns of these anomalies were  
656 controlled by the seismogenic tectonics and local topography. The temperature  
657 variation of the soil and the near-surface atmosphere, which was mainly distributed in  
658 the intermountain northwest of the main shock epicenter, indicated that the thermal  
659 anomalies were geo-related to the large thrusts outside the rupturing zone. Moreover,  
660 the zones of the most intensive soil and air temperature anomalies were consistent with  
661 that of NTG from the satellite and with the increased  $b$ -value in phase P1-2. The results  
662 related to the hydrographic and thermal anomalies in the coversphere and atmosphere  
663 compensate for the deficiency in current interpretations on the LCA coupling of the  
664 2009 L'Aquila earthquake. The supplemental temporal analysis of air temperature and  
665 AOD further proved the dates of thermal anomalies and supported the coversphere-  
666 atmosphere coupling effects.

667 As a parameter of stress meter, the  $b$ -value should be applied to earthquake anomaly  
668 recognition and the analysis of geosphere coupling effects to logically and spatially link  
669 multiple observations on the coversphere and atmosphere with that on the lithosphere.  
670 In this study, we deduced from the dynamic variation of the  $b$ -values that the regional  
671 stress had started to rapidly accumulate in late December 2008 and soon entered the  
672 nucleation stage. The end of March, 2009 was possibly a critical time node of stress  
673 transition. The 3D variation features of the  $b$ -values revealed that the regional crust  
674 stress accumulated to a relatively high level from phase P1-1 to phase P2-2 in the  
675 hypocenter area before the main shock. The  $b$ -values notably decreased after the main  
676 shock because of the aftershock sequence. Furthermore, the relation between the  $b$ -  
677 values and the hypocenter depth indicated that the shallow crust with a depth of less  
678 than 10 km was the main geo-layer characterized by a high stress level, especially near  
679 the *Paganica* fault and the southern segment of the *Olevano–Antrodoco* thrust. The  
680 depth of  $10 \pm 5$  km was considered as the main depth range of the crustal stress

681 transition related to the 2009 L'Aquila earthquake.  
682 Regional/local tectonics, lithology, hydrogeology, geochemistry, and land cover have  
683 great influence and/or control over the generation and spatio-temporal evolution of  
684 multiple anomalies before a tectonic earthquake. CO<sub>2</sub>-rich underground fluids played a  
685 vital role in the coupling processes from the lithosphere to the coversphere in the 2009  
686 L'Aquila earthquake because their characteristics benefitted the migration of mass and  
687 energy from the lithosphere to the coversphere. Hence, to clearly understand the  
688 phenomena and mechanisms of anomalous signals related to tectonic earthquakes, we  
689 need to pay close attention to local geological, hydrogeological, and geographical  
690 environments. The coversphere is a key part of geospheres and has a major effect on  
691 the production and transmission of seismic signals as well as anomalies. Knowledge of  
692 the coversphere is extremely important in studying the mechanism and physical process  
693 of LCA or LCAI coupling before tectonic earthquakes. Moreover, certain particular  
694 matters in the deep Earth, such as deep-originated fluid, including water and gases,  
695 should be investigated to analyze and understand the observed pre-earthquake  
696 anomalies.

### 697 **Acknowledgements**

698 This work is supported by the National Basic Research Program of China (973 Program)  
699 (Grant No.2011CB707102) of the China Ministry of Science and the Technology, and  
700 some parts of this work has been performed under the auspices of the SAFE (Swarm  
701 for Earthquake study) ESA-funded Project. The hydrothermal parameters were  
702 obtained freely by ERA-Interim (<http://apps.ecmwf.int/datasets/data>) and NCEP-FNL  
703 (<http://rda.ucar.edu/datasets>). The AOD data were obtained freely from NASA  
704 AORNET (<http://aeronet.gsfc.nasa.gov/>). The *b*-value data were generated by Italy  
705 seismic catalog and obtained by INGV (ISIDE: <http://iside.rm.ingv.it>). The seismic and  
706 weather data about L'Aquila have been downloaded from two open-access (upon free  
707 registration) websites: The seismic data from seismic catalog ISIDE  
708 (<http://iside.rm.ingv.it/>) maintained by the Istituto Nazionale di Geofisica e Vulcanologia  
709 (INGV), Italy, while the weather data have been taken from <http://cetemps.aquila.infn.it/>  
710 maintained by CETEMPS, Italy.



711 **References**

- 712 Akhoondzadeh, M., M. Parrot, and M. R. Saradjian (2010). Electron and ion density  
713 variations before strong earthquakes ( $M > 6.0$ ) using DEMETER and GPS data. *Nat.*  
714 *Hazards Earth Syst. Sci.*, 10, 7-18, doi:10.5194/nhess-10-7-2010.
- 715 Benoit, M. H., M. Torpey, K. Liszewski, V. Levin, and J. Park (2011). P and S wave  
716 upper mantle seismic velocity structure beneath the northern Apennines: New  
717 evidence for the end of subduction. *Geochem. Geophys. Geosys.*, 12(6), 1-19,  
718 doi:10.1029/2010GC003428.
- 719 Bonfanti, P., N. Genzano, J. Heinicke, F. Italiano, G. Martinelli, N. Pergola, L. Telesca,  
720 and V. Tramutoli (2012). Evidence of CO<sub>2</sub>-gas emission variations in the central  
721 Apennines (Italy) during the L'Aquila seismic sequence (March-April 2009).  
722 *Boll.Geof.Teor.Appl.*, 53, 147-168, doi:10.4430/bgta0043.
- 723 Chai, W., G. X. Wang, Y. S. Li, and H. C. Hu (2008). Response of soil moisture under  
724 different vegetation coverage to precipitation in the headwaters of the Yangtze river.  
725 *J. Glaciol. Geocryol. (in Chinese)*, 30(2), 329-337.
- 726 Che, H., X. Xia, J. Zhu, Z. Li, O. Dubovik, B. Holben, P. Goloub, H. Chen, V. Estelles,  
727 E. Cuevas-Agullo, L. Blarel, H. Wang, H. Zhao, X. Zhang, Y. Wang, J. Sun, R. Tao,  
728 X. Zhang and G. Shi (2014). Column aerosol optical properties and aerosol radiative  
729 forcing during a serious haze-fog month over North China Plain in 2013 based on  
730 ground-based sunphotometer measurements. *Atmos.Chem.Phys.* 14, 2125-2138,  
731 doi:10.5194/acp-14-2125-2014.
- 732 Cianchini, G., A. De Santis, D. R. Barraclough, L. X. Wu, and K. Qin (2012). Magnetic  
733 transfer function entropy and the 2009  $M_w = 6.3$  L'Aquila earthquake (Central Italy).  
734 *Nonlin. Processes Geophys.*, 19, 401-409, doi:10.5194/npg-19-401 -2012.
- 735 Cicerone, R. D., J. E. Ebel, and J. Britton (2009). A systematic compilation of  
736 earthquake precursors. *Tectonophysics.*, 476, 371-396, doi:10.1016/j.tecto.2009.06.  
737 008.
- 738 Chiarabba, C., S. Bagh, I. Bianchi, P. De Gori and M. Barchi (2010). Deep structural  
739 heterogeneities and the tectonic evolution of the Abruzzi region (Central Apennines,  
740 Italy) revealed by microseismicity, seismic tomography, and teleseismic receiver

741 functions. *Earth Planet. Sc. Lett.* 295, 462-476, doi:10.1016/j.epsl.2010.04.028.

742 Chiodini, G., C. Cardellini, A. Amato, E. Boschi, S. Caliro, F. Frondini, and G. Ventura  
743 (2004). Carbon dioxide Earth degassing and seismogenesis in central and southern  
744 Italy. *Geophys.Res.Lett.*, 31, L07615, doi:10.1029/2004GL019480.

745 Chiodini, G., F. Frondini, C. Cardellini, F. Parello, and L. Peruzzi (2000). Rate of  
746 diffuse carbon dioxide Earth degassing estimated from carbon balance of regional  
747 aquifers: The case of central Apennine, Italy. *J.Geophys.Res.*, 105(B4), 8423-8434,  
748 doi:10.1029/1999JB900355.

749 Chiodini, G., S. Caliro, C. Cardellini, F. Frondini, S. Inguaggiato, and F. Matteucci  
750 (2011). Geochemical evidence for and characterization of CO<sub>2</sub> rich gas sources in  
751 the epicentral area of the Abruzzo 2009 earthquakes. *Earth Planet. Sci. Lett.*, 304,  
752 389-398, doi:10.1016/j.epsl.2011.02.016.

753 Crutzen, P. J. (1974). Photochemical reactions initiated by and influencing ozone in  
754 unpolluted tropospheric air. *Tellus.* 26, 47-57, doi:10.1111/j.2153-3490.1974.tb0  
755 1951.x.

756 De Santis, A., G. Cianchini, P. Favali, L. Beranzoli, and E. Boschi (2011). The  
757 Gutenberg–Richter Law and Entropy of Earthquakes: Two Case Studies in Central  
758 Italy. *B.Seismol.Soc.Am.*, 101(3), 1386-1395, doi:10.1785/0120090390.

759 Dentener, F., S. Kinne, T. Bond, O. Boucher, J. Cofala, S. Generoso, P. Ginoux, S. Gong,  
760 J. J. Hoelzemann, A. Ito, L. Marelli, J. E. Penner, J. P. Putaud, C. Textor, M. Schulz,  
761 G. R. van der Werf and J. Wilson (2006). Emissions of primary aerosol and precursor  
762 gases in the years 2000 and 1750 prescribed data-sets for AeroCom. *Atmos. Chem.*  
763 *Phys.* 6, 4321-4344, doi:10.5194/acp-6-4321-2006.

764 Dey, S., and R. P. Singh (2003). Surface latent heat flux as an earthquake precursor. *Nat.*  
765 *Hazards Earth Syst.Sci.*, 3 (6), 749-755, doi:10.5194/nhess-3-749-2003.

766 Di Luccio, F., G. Ventura, R. Di Giovambattista, A. Piscini, and F. R. Cinti (2010).  
767 Normal faults and thrusts reactivated by deep fluids: The 6 April 2009 Mw 6.3  
768 L'Aquila earthquake, central Italy. *J.Geophys.Res.*, 115, B06315, doi:10.1029/  
769 2009JB007190.

770 Di Luzio, E., G. Mele, M. M. Tiberti, G. P. Cavinato, and M. Parotto (2009). Moho

771 deepening and shallow upper crustal delamination beneath the central Apennines.  
772 *Earth Planet. Sci. Lett.*, 280, 1-12, doi: 10.1016/j.epsl.2008.09.018.

773 Doglioni, C. (1995). Geological remarks on the relationships between extension and  
774 562 convergent geodynamic settings. *Tectonophysics*. 252, 253-268, doi:10.1016/  
775 0040-1951(95)00087-9.

776 Eftaxias, K., G. Balasis, Y. Contoyiannis, C. Papadimitriou, M. Kalimeri, L.  
777 Athanasopoulou, S. Nikolopoulos, J. Kopanas, G. Antonopoulos, and C. Nomicos  
778 (2010). Unfolding the procedure of characterizing recorded ultralow frequency, kHz  
779 and MHz electromagnetic anomalies prior to the L'Aquila earthquake as pre-seismic  
780 ones - Part 2. *Nat. Hazards Earth Syst. Sci.*, 10, 275-294, doi:10.5194/nhess-10-  
781 275-2010.

782 Freund, F. (2011). Pre-earthquake signals: Underlying physical processes. *J. Asian*  
783 *Earth Sci.*, 41, 383-400, doi:10.1016/j.jseaes.2010.03.009.

784 Frezzotti, M. L., A. Peccerillo, and G. Panza (2009). Carbonate metasomatism and CO<sub>2</sub>  
785 lithosphere–asthenosphere degassing beneath the Western Mediterranean: an  
786 integrated model arising from petrological and geophysical data. *Chem. Geol.*  
787 262,108-120, doi:10.1016/j.chemgeo.2009.02.015.

788 Galadini, F., and P. Galli (2000). Active Tectonics in the Central Apennines (Italy) -  
789 Input Data for Seismic Hazard Assessment. *Nat. Hazards.*, 22(3), 225-268, doi:  
790 10.1023/A:1008149531980.

791 Geng, N. G., P. Yu, M. D. Deng, C. Y. Cui, and Z. L. Luo (1998). The simulated  
792 experimental studies on cause of thermal infrared precursor of earthquake.  
793 *Earthquake (in Chinese)*, 18(1):83-88.

794 Genzano, N., C. Aliano, R. Corrado, C. Filizzola, M. Lisi, G. Mazzeo, R. Paciello, N.  
795 Pergola, and V. Tramutoli (2009). RST analysis of MSG-SEVIRI TIR radiances at  
796 the time of the Abruzzo 6 April 2009 earthquake. *Nat. Hazards Earth Syst. Sci.*, 9,  
797 2073-2084, doi:10.5194/nhess-9-2073-2009.

798 Gregori, G. P., M. Poscolieri, G. Paparo, S. De Simone, C. Rafanelli, and G. Ventrice  
799 (2010). “Storms of crustal stress” and AE earthquake precursors. *Nat. Hazards Earth*  
800 *Syst. Sci.*, 10, 319-337, doi:10.5194/nhess-10-319-2010.

801 Gulia, L., and S. Wiemer (2010). The influence of tectonic regimes on the earthquake  
802 size distribution: A case study for Italy. *Geophys.Res.Lett.*, 37, L10305,  
803 doi:10.1029/2010GL043066.

804 Gutenberg, B., and C. F. Richter (1944). Frequency of earthquake in California.  
805 *B.Seismol.Soc.Am.*, 34,185-188.

806 Hubbert, K. M., and Rubey, W. W. (1959). Role of Fluid pressure in mechanics of  
807 overthrust faulting. *Geol.Soc.Am. Bull.*, 70, 115-166, doi:10.1130/0016-7606(1959)  
808 70[115:ROFPIM]2.0.CO;2.

809 Janson, R., K. Rosman, A. Karlsson, and C. Hansson (2001). Biogenic emissions and  
810 gaseous precursors to forest aerosols. *Tellus*. 53(B), 423-440, doi:10.1034/j.1600-  
811 0889.2001.530408.x.

812 Jing, F., X. H. Shen, C. L. Kang, X. Pan, and K. Sun (2012). Variation of outgoing  
813 longwave radiation around the time of New Zealand earthquake M7.1, 2010. *Adv.*  
814 *Earth Sci. (in Chinese)*, 27(9), 979-986.

815 Jordan, T. H., Y. T. Chen, P. Gasparini, R. Madariaga, I. Main, W. Marzocchi, G.  
816 Papadopoulos, G. Sobolev, K. Yamaoka, and J. Zschau (2011). Operational  
817 Earthquake Forecasting: State of knowledge and guidelines for utilization.  
818 *Ann.Geophys.*, 54(4), 315-391, doi: 10.4401/ag-5350.

819 Kagan, Y. (1999). Universality of the seismic moment-frequency relation. *PAGEOP*,  
820 155, 537-574, doi:10.1007/s000240050277.

821 Liperovsky, V. A., C. V. Meister, E. V. Liperovskaya, and V. V. Bogdanov (2008a). On  
822 the generation of electric field and infrared radiation in aerosol clouds due to radon  
823 emanation in the atmosphere before earthquakes. *Nat. Hazards Earth Syst. Sci.*, 8,  
824 1199-1205, doi:10.5194/nhess-8-1199-2008.

825 Liperovsky, V. A., O. A. Pokhotelov, C. V. Meister, and E. V. Liperovskaya (2008b).  
826 Physical models of coupling in the lithosphere–atmosphere–ionosphere system  
827 before earthquakes. *Geomagn.Aeronomy.*, 48 (6), 795-806, doi:10.1134/S001679  
828 3208060133.

829 Lisi, M., C. Filizzola, N. Genzano, C. S. L. Grimaldi, T. Lacava, F. Marchese, G.  
830 Mazzeo, N. Pergola, and V. Tramutoli (2010). A study on the Abruzzo 6 April 2009

831 earthquake by applying the RST approach to 15 years of AVHRR TIR observations.  
832 *Nat. Hazards Earth Syst. Sci.*, 10, 395-406, doi:10.5194/nhess-10-395-2010.

833 Lucente, F. P., P. De Gori, L. Margheriti, D. Piccinini, M. Di Bona, C. Chiarabba, and  
834 N. P. Agostinetti (2010). Temporal variation of seismic velocity and anisotropy  
835 before the 2009 Mw 6.3 L'Aquila earthquake, Italy. *Geology*, 38 (11), 1015-1018,  
836 doi:10.1130/G31463.1.

837 Millikin, C. S., and C. S. Bledsoe (1999). Biomass and distribution of fine and coarse  
838 roots from blue oak (*Quercus douglasii*) trees in the northern Sierra Nevada foothills  
839 of California. *Plant.Soil.*, 214, 27-81, doi:10.1023/A:1004653932675.

840 Minissale, A. (2004). Origin, transport and discharge of CO<sub>2</sub> in central Italy. *Earth*  
841 *Sci.Rev.*, 66, 89-141, doi:10.1016/j.earscirev.2003.09.001.

842 Mogi, K. (1962). Magnitude-Frequency relation for elastic shocks accompanying  
843 fractures of various materials and some related problems in earthquakes.  
844 *B.Earthq.Res.Inst.*, 40, 831-853.

845 Montone, P., M. T. Mariucci, and S. Pondrelli (2012). The Italian present-day stress  
846 map. *Geophys. J. Int.*, 189, 705-716, doi:10.1111/j.1365-246X.2012.05391.x.

847 Montone, P., M. T. Mariucci, S. Pondrelli, and A. Amato (2004). An improved stress  
848 map for Italy and surrounding regions (central Mediterranean). *J.Geophys.Res.*, 109,  
849 B10410, doi:10.1029/2003JB002703.

850 Ouzounov, D., D. F. Liu, C. L. Kang, G. Cervone, M. Kafatos, and P. Taylor (2007).  
851 Outgoing longwave radiation variability from IR satellite data prior to major  
852 earthquakes. *Tectonophysics*, 431, 211-220, doi:10.1016/j.tecto.2006.05.042.

853 Papadopoulos, G. A., M. Charalampakis, A. Fokaefs, and G. Minadakis (2010). Strong  
854 foreshock signal preceding the L'Aquila (Italy) earthquake ( Mw 6.3) of 6 April  
855 2009. *Nat. Hazards Earth Syst. Sci.*, 10, 19-24, doi:10.5194/nhess-10-19-2010.

856 Patacca, E., P. Scandone, E. Di Luzio, G. P. Cavinato, and M. Parotto (2008). Structural  
857 architecture of the central Apennines: Interpretation of the CROP 11 seismic profile  
858 from the Adriatic coast to the orographic divide. *Tectonics*, 27(3), 620-628,  
859 doi:10.1029/2005TC001917.

860 Pergola, N., C. Aliano, I. Coviello, C. Filizzola, N. Genzano, T. Lacava, M. Lisi, G.

861 Mazzeo, and V. Tramutoli (2010). Using RST approach and EOS-MODIS radiances  
862 for monitoring seismically active regions: a study on the 6 April 2009 Abruzzo  
863 earthquake. *Nat. Hazards Earth Syst. Sci.*, 10, 239-249, doi:10.5194/nhess-10-239-  
864 2010.

865 Piroddi, L., and G. Ranieri (2012). Night thermal gradient: a new potential tool for  
866 earthquake precursors studies. an application to the seismic area of L'Aquila (central  
867 Italy). *IEEE J. STARS.*, 5(1), 307-312, doi:10.1109/JSTARS.2011.2177962.

868 Piroddi, L., G. Ranieri, F. Freund, and A. Trogu (2014). Geology, tectonics and  
869 topography underlined by L'Aquila earthquake TIR precursors. *Geophys.J.Int.*, 197,  
870 1532-1536, doi:10.1093/gji/ggu123.

871 Plastino, W., P. P. Povinec, G. D. Luca, C. Doglioni, S. Nisi, L. Ioannucci, M. Balata,  
872 M. Laubenstein, F. Bella, and E. Coccia (2010). Uranium groundwater anomalies  
873 and L'Aquila earthquake, 6th April 2009 (Italy). *J. Environ. Radioactiv.*, 101(1), 45-  
874 50, doi:10.1016/j.jenvrad.2009.08.009.

875 Pulinets, S. A. (2012). Low-latitude atmosphere-ionosphere effects initiated by strong  
876 earthquakes preparation process. *Int.J.Geophys.*, 14, 1-14, doi:10.1155/2012/  
877 131842.

878 Pulinets, S. A., and D. Ozounov (2011). Lithosphere-Atmosphere-Ionosphere Coupling  
879 (LAIC) model-An unified concept for earthquake precursors validation. *J. Asian  
880 Earth Sci.*, 41, 371-382, doi: 10.1016/j.jseaes.2010.03.005.

881 Pulinets, S. A., D. Ozounov, G. Giuliani, L. Ciraolo, and P. Taylor (2010). Atmosphere  
882 awakening prior to Abruzzo, Italy, M6.3 Earthquake of April 6, 2009 revealed by  
883 joined satellite and ground observations. *Geophysical Research Abstracts*, 12,  
884 EGU2010-12869.

885 Pulinets, S. A., D. Ozounov, L. Ciraolo, R. Singh, G. Cervone, A. Leyva, M. Dunajecka,  
886 A. V. Karelin, K. A. Boyarchunk, and A. Kotsarenko (2006). Thermal, atmospheric  
887 and ionospheric anomalies around the time of the Colima M7.8 earthquake of 21  
888 January 2003. *Ann. Geophys.*, 24, 835-849, doi:10.5194/angeo-24-835-2006.

889 Qin, K., L. X. Wu, A. De Santis, J. Meng, W. Y. Ma, and G. Cianchini (2012). Quasi-  
890 synchronous multi-parameter anomalies associated with the 2010-2011 New

891 Zealand earthquake sequence. *Nat. Hazards Earth Syst. Sci.*, 12, 1059-1072, doi:  
892 10.5194/nhess-12-1059-2012.

893 Qin, K., L. Wu, X. Y. Ouyuang, X. H. Shen, and S. Zheng (2014a). Surface latent heat  
894 flux anomalies quasi-synchronous with ionospheric disturbances before the 2007  
895 Pu'er earthquake in China. *Adv. Space Res.*, 53(2), 266-271, doi:10.1016/j.asr.  
896 2013.11.004.

897 Qin, K., L. Wu, S. Zheng, Y. Bai, and X. Lv (2014b). Is there an abnormal enhancement  
898 of atmospheric aerosol before the 2008 Wenchuan earthquake? *Adv. Space Res.*, 54,  
899 1029-1034, doi:10.1016/j.asr.2014.04.025.

900 Qin, K., L. Wu, S. Zheng, and S. Liu (2013). A Deviation-Time-Space-Thermal (DTS-  
901 T) Method for Global Earth Observation System of Systems (GEOSS)-Based  
902 Earthquake Anomaly Recognition: Criteria and Quantify Indices. *Remote Sens.*,  
903 5(10), 5143-5151, doi:10.3390/rs5105143.

904 Quattrocchi, F., G. Galli, A. Gasparini, L. Magno, L. Pizzino, A. Sciarra, and N.  
905 Voltattorni (2011). Very slightly anomalous leakage of CO<sub>2</sub>, CH<sub>4</sub> and radon along  
906 the main activated faults of the strong L'Aquila earthquake (Magnitude 6.3, Italy).  
907 Implications for risk assessment monitoring tools & public acceptance of CO<sub>2</sub> and  
908 CH<sub>4</sub> underground storage. *Energy Procedia*, 4, 4067-4075, doi:10.1016/j.egypro.  
909 2011.02.349.

910 Rickard, A. R., K. P. Wyche, A. Metzger, P. S. Monks, A. M. Ellis, J. Dommen, U.  
911 Baltensperger, M. E. Jenkin, and M. J. Pilling (2010). Gas phase precursors to  
912 anthropogenic secondary organic aerosol: Using the Master Chemical Mechanism to  
913 probe detailed observations of 1,3,5-trimethylbenzene photo-oxidation. *Atmos.*  
914 *Environ.*, 44, 5423-5433, doi:10.1016/j.atmosenv.2009.09.043.

915 Rozhnoi, A., M. Solovieva, O. Molchanov, K. Schwingenschuh, M. Boudjada, P. F.  
916 Biagi, T. Maggipinto, L. Castellana, A. Ermini, and M. Hayakawa (2009).  
917 Anomalies in VLF radio signals prior the Abruzzo earthquake (M=6.3) on 6 April  
918 2009. *Nat. Hazards Earth Syst. Sci.*, 9, 1727-1732, doi:10.5194/nhess-9-1727-2009.

919 Saraf, A. K., and S. Choudhury (2004). Satellite detects surface thermal anomalies  
920 associated with the Algerian earthquakes of May 2003. *Int. J. Remote Sens.*, 26,

921 2705-2713, doi:10.1080/01431160310001642359.

922 Schorlemmer, D., and S. Wiemer (2004). Earthquake statistics at Parkfield: 1.  
923 Stationarity of b values. *J.Geophys.Res.*, 109(B12), 159-163, doi:10.1029/2004  
924 JB003234.

925 Schorlemmer, D., and S. Wiemer (2005). Earth science: Microseismicity data forecast  
926 rupture area. *Nature*, 434, 1086, doi:10.1038/4341086a.

927 Schorlemmer, D., S. Wiemer, and M. Wyss (2005). Variations in earthquake-size  
928 distribution across different stress regimes. *Nature*, 437(22), 539-542, doi:10.1038  
929 /nature04094.

930 Terakawa, T., A. Zoporowski, B. Galvan, and S. A. Miller (2010). High-pressure fluid  
931 at hypocentral depths in the L'Aquila region inferred from earthquake focal  
932 mechanisms. *Geology*, 38 (11), 995-998, doi:10.1130/G31457.1.

933 Tormann, T., B. Enescu, J. Woessner, and S. Wiemer (2015). Randomness of  
934 megathrust earthquakes implied by rapid stress recovery after the Japan earthquake.  
935 *Nat.Geosci.*, 8, 152-158, doi:10.1038/ngeo2343.

936 Tormann, T., S. Wiemer, and A. Mignan (2014). Systematic survey of high-resolution  
937 b value imaging along Californian faults: Inference on asperities.  
938 *J.Geophys.Res.Solid Earth*, 119, 2029-2054, doi:10.1002/2014JB011269.

939 Tozer, R. S. J., R. W. H. Butler, and S. Corrado (2002). Comparing thin- and thick-  
940 skinned thrust tectonic models of the Central Apennines, Italy. *EGU Stephan  
941 Mueller Special Publication Series*, 1, 181-194, doi:10.5194/smsps-1-181-2002.

942 Tronin, A. A., M. Hayakawa, and O.A. Molchanov (2002). Thermal IR satellite data  
943 application for earthquake research in Japan and China. *J.Geodyn.*, 33, 519-534,  
944 doi:10.1016/S0264-3707(02)00013-3.

945 Tsolis, G. S., and T. D. Xenos (2010). A qualitative study of the seismo-ionospheric  
946 precursors prior to the 6 April 2009 earthquake in L'Aquila, Italy. *Nat. Hazards  
947 Earth Syst. Sci.*, 10, 133-137, doi:10.5194/nhess-10-133-2010.

948 Urbancic, T. I., C. I. Trifu, J. M. Long, and R. P. Young (1992). Space-time correlations  
949 of b values with stress release. *PAGEOP.*, 139, 449-462, doi:10.1007/ BF00879946.

950 USGS (2009). <http://earthquake.usgs.gov/earthquakes/eqinthenews/2009/us2009fcfa>



951 [/#summary.](#)

952 Voltattorni, N., F. Quattrocchi, A. Gasparini, and A. Sciarra (2012). Soil gas degassing  
953 during the 2009 L'Aquila earthquake: study of the seismotectonic and fluid  
954 geochemistry relation. *Ital. J. Geosci. (Boll. Soc. Geol. It.)*, 131(3), 440-447,  
955 doi:10.3301/IJG.2012.19.

956 Warren, N. W., and G. V. Latham (1970). An experimental study of thermally induced  
957 microfracturing and its relation to volcanic seismicity. *J. Geophys. Res.*, 75, 4455-  
958 4464, doi:10.1029/JB075i023p04455.

959 Wiemer, S. (2001). A software package to analyze seismicity: ZMAP. *Seismol. Res. Lett.*,  
960 72 (3), 373-382, doi:10.1785/gssrl.72.3.373.

961 Wiemer, S., and M. Wyss (2002). Mapping spatial variability of the frequency-  
962 magnitude distribution of earthquakes. *Adv. Geophys.*, 45, 259-302,  
963 doi:10.1016/S0065-2687(02)80007-3.

964 Wu, L. X., K. Qin, and S. J. Liu (2012). GEOSS-Based Thermal Parameters Analysis  
965 for Earthquake Anomaly Recognition. *P.IEEE.*, 100(10), 2891-2907, doi:10.1109/  
966 JPROC.2012.2184789.

967 Wu, L. X., S. J. Liu, X. H. Xu, Y. H. Wu, and Y. Q. Li (2004). Remote sensing-rock  
968 mechanics— laws of thermal infrared radiation and acoustic emission from friction  
969 sliding intersected faults and its meanings for tectonic earthquake omens. *Chin. J.*  
970 *of Rock Mech. & Engin (in Chinese)*., 23(3), 401-407.

971 Wu, L. X., S. J. Liu, Y. H. Wu, and C. Y. Wang (2006). Precursors for rock fracturing  
972 and failure-Part I: IRR image abnormalities. *Int J Rock Mech Mining Sci.*, 43(3),  
973 473-482, doi:10.1016/j.ijrmms.2005.09.002.

974 Wyss, M., and S. Wiemer (2000). Change in the Probability for Earthquakes in Southern  
975 California Due to the Landers Magnitude 7.3 Earthquake. *Science*, 290, 1334-1338,  
976 doi:10.1126/science.290.5495.1334.

977 Zheng, S., L. X. Wu, and K. Qin (2014). Multiple parameters anomalies for verifying  
978 the geosystem spheres coupling effect: a case study of the 2010 Ms7.1 Yushu  
979 earthquake in China. *Ann. Geophys.*, 57(4), S0434, doi:10.4401/ag-6508.

980

981

982 **Table 1** Reported multiple parameter anomalies associated with the Mw 6.3 2009 L'Aquila  
 983 earthquake

| <i>Parameters</i>           | <i>Date of alternative anomalies</i>                 | <i>Geospheres</i>      | <i>Reference</i>          |
|-----------------------------|------------------------------------------------------|------------------------|---------------------------|
| Acoustic Emission           | from 4 <sup>th</sup> to 5 <sup>th</sup> March        | Lithosphere            | Gregori et al., 2010      |
| Seismicity rate             | from 27 <sup>th</sup> March to 6 <sup>th</sup> April | Lithosphere            | Papadopoulos et al., 2010 |
| <i>b</i> -value             | 27 <sup>th</sup> March                               | Lithosphere            | Papadopoulos et al., 2010 |
| Entropy of <i>b</i> -value  | from 31 <sup>st</sup> March to 6 <sup>th</sup> April | Lithosphere            | De Santis et al., 2011    |
| ULF magnetic                | from 29 <sup>th</sup> March to 3 <sup>rd</sup> April | Lithosphere            | Eftaxias et al., 2009     |
| VLF electric                | started on 1 <sup>st</sup> April                     | Lithosphere            | Rozhnoi et al., 2009      |
| CO <sub>2</sub> flow-rate   | started on 31 <sup>st</sup> March                    | Coversphere            | Bonfanti et al., 2012     |
| Radon                       | started on 30 <sup>th</sup> March                    | Coversphere            | Pulinets et al., 2010     |
| Uranium groundwater         | started at beginning of March                        | Coversphere            | Plastino et al., 2009     |
| Land surface temperature    | started on 29 <sup>th</sup> March                    | Coversphere            | Piroddi and Ranieri, 2012 |
| Thermal infrared radiation  | from 30 <sup>th</sup> March to 1 <sup>st</sup> April | Coversphere/Atmosphere | Lisi et al., 2010         |
| Thermal infrared radiation  | from 30 <sup>th</sup> March to 1 <sup>st</sup> April | Coversphere/Atmosphere | Pergola et al., 2010      |
| Thermal infrared radiation  | from 30 <sup>th</sup> to 31 <sup>st</sup> March      | Coversphere/Atmosphere | Genzano et al., 2009      |
| F2-layer critical frequency | 16 <sup>th</sup> March, 5 <sup>th</sup> April        | Ionosphere             | Tsolis and Xenos, 2010    |
| Total electron content      | 2 <sup>nd</sup> April, 4 <sup>th</sup> April         | Ionosphere             | Akhoondzadeh et al., 2010 |

984

985

986

987

988

989

990

991

992

993

994

995

996

997 **Table 2** Hydrothermal parameter anomalies from March 29 to April 1, 2009 (quasi-synchronous  
 998 period)

| <i>Parameters</i>                      | <i>Alternative anomaly date</i> | <i>Abnormal deviation</i> |                   | <i>Spatial anomaly</i>                                                                                                                                                                  |
|----------------------------------------|---------------------------------|---------------------------|-------------------|-----------------------------------------------------------------------------------------------------------------------------------------------------------------------------------------|
|                                        |                                 | $> \mu + 1.5\sigma$       | $> \mu + 2\sigma$ |                                                                                                                                                                                         |
| SML1 (m <sup>3</sup> /m <sup>3</sup> ) | March 29                        | 0.007                     |                   | Strongly concentrated in L'Aquila basin and geo-related to <i>Olevano-Antrodoco</i> and <i>Gran Sasso</i> thrusts to the north.                                                         |
|                                        | March 31                        | 0.003                     |                   | Concentrated in L'Aquila basin and geo-related to <i>Olevano-Antrodoco</i> and <i>Gran Sasso</i> thrusts to the north, but it was smaller and weaker than that on March 29.             |
| STL1 (K)                               | March 30                        | 1.13                      |                   | Strongly concentrated on the east of the mainshock with EW trending (crossing the southern part of <i>Olevano-Antrodoco</i> thrust) and extended to the northwest of the central Italy. |
| PWATclm (kg/m <sup>2</sup> )           | March 29                        |                           | 8.97              | Strongly covered the entire land and sea of the central and southern Italy and weakly concentrated on the east part of L'Aquila basin (the south of <i>Gran Sasso</i> thrust).          |
|                                        | March 30                        |                           | 0.03              | Unapparent                                                                                                                                                                              |
|                                        | March 31                        |                           | 0.11              | Unapparent                                                                                                                                                                              |
| TMP2m (K)                              | March 29                        |                           | 0.53              | Strongly and largely distributed in the northwest of the central Italy (to the west of <i>Olevano-Antrodoco</i> thrust).                                                                |
|                                        | March 30                        |                           | 1.05              | Unapparent                                                                                                                                                                              |
|                                        | March 31                        |                           | 1.28              | Distributed in the northwest of the central Italy (to the west of <i>Olevano-Antrodoco</i> thrust), but was smaller and weaker than that on March 29.                                   |
|                                        | April 1                         | 0.571                     |                   | Unapparent                                                                                                                                                                              |

999

1000

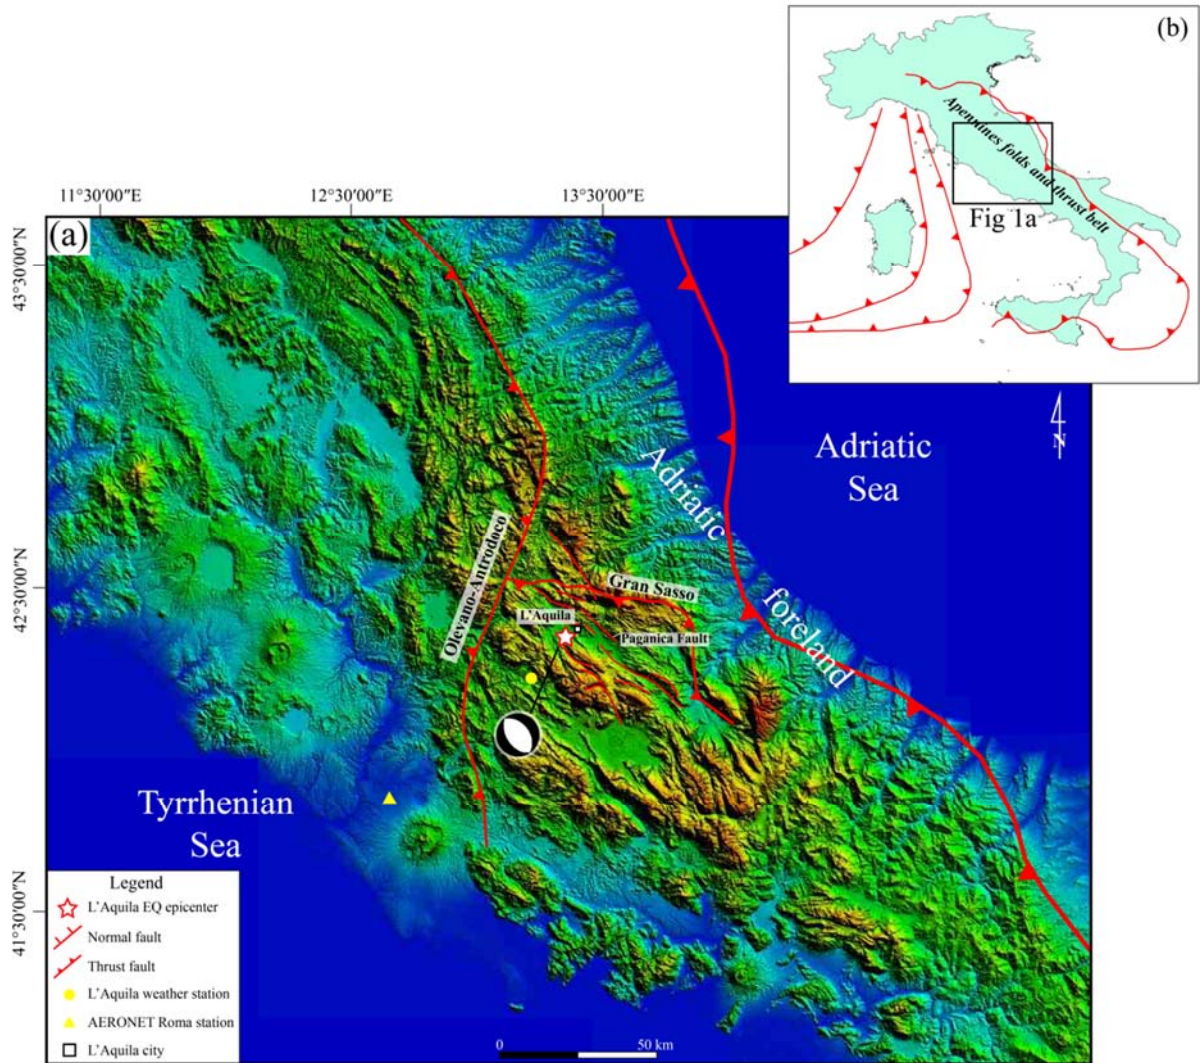

1001  
 1002  
 1003  
 1004  
 1005  
 1006  
 1007  
 1008  
 1009  
 1010  
 1011  
 1012  
 1013  
 1014  
 1015  
 1016  
 1017  
 1018  
 1019

**Fig. 1** Simplified tectonic and topographic map of central Italy. (a) DEM from the Shuttle Radar Topography Mission (SRTM) data showing the epicenter of the 2009 L'Aquila earthquake (white star) along with its focal mechanism solution (FMS). The FMS was obtained from the US Geological Survey's National Earthquake Information Center (Di Luccio et al., 2010; Piroddi et al. 2014). (b) The main thrusts in Italy, with the black solid line box showing the geographical location of Fig. 1a (Benoit et al. 2011).

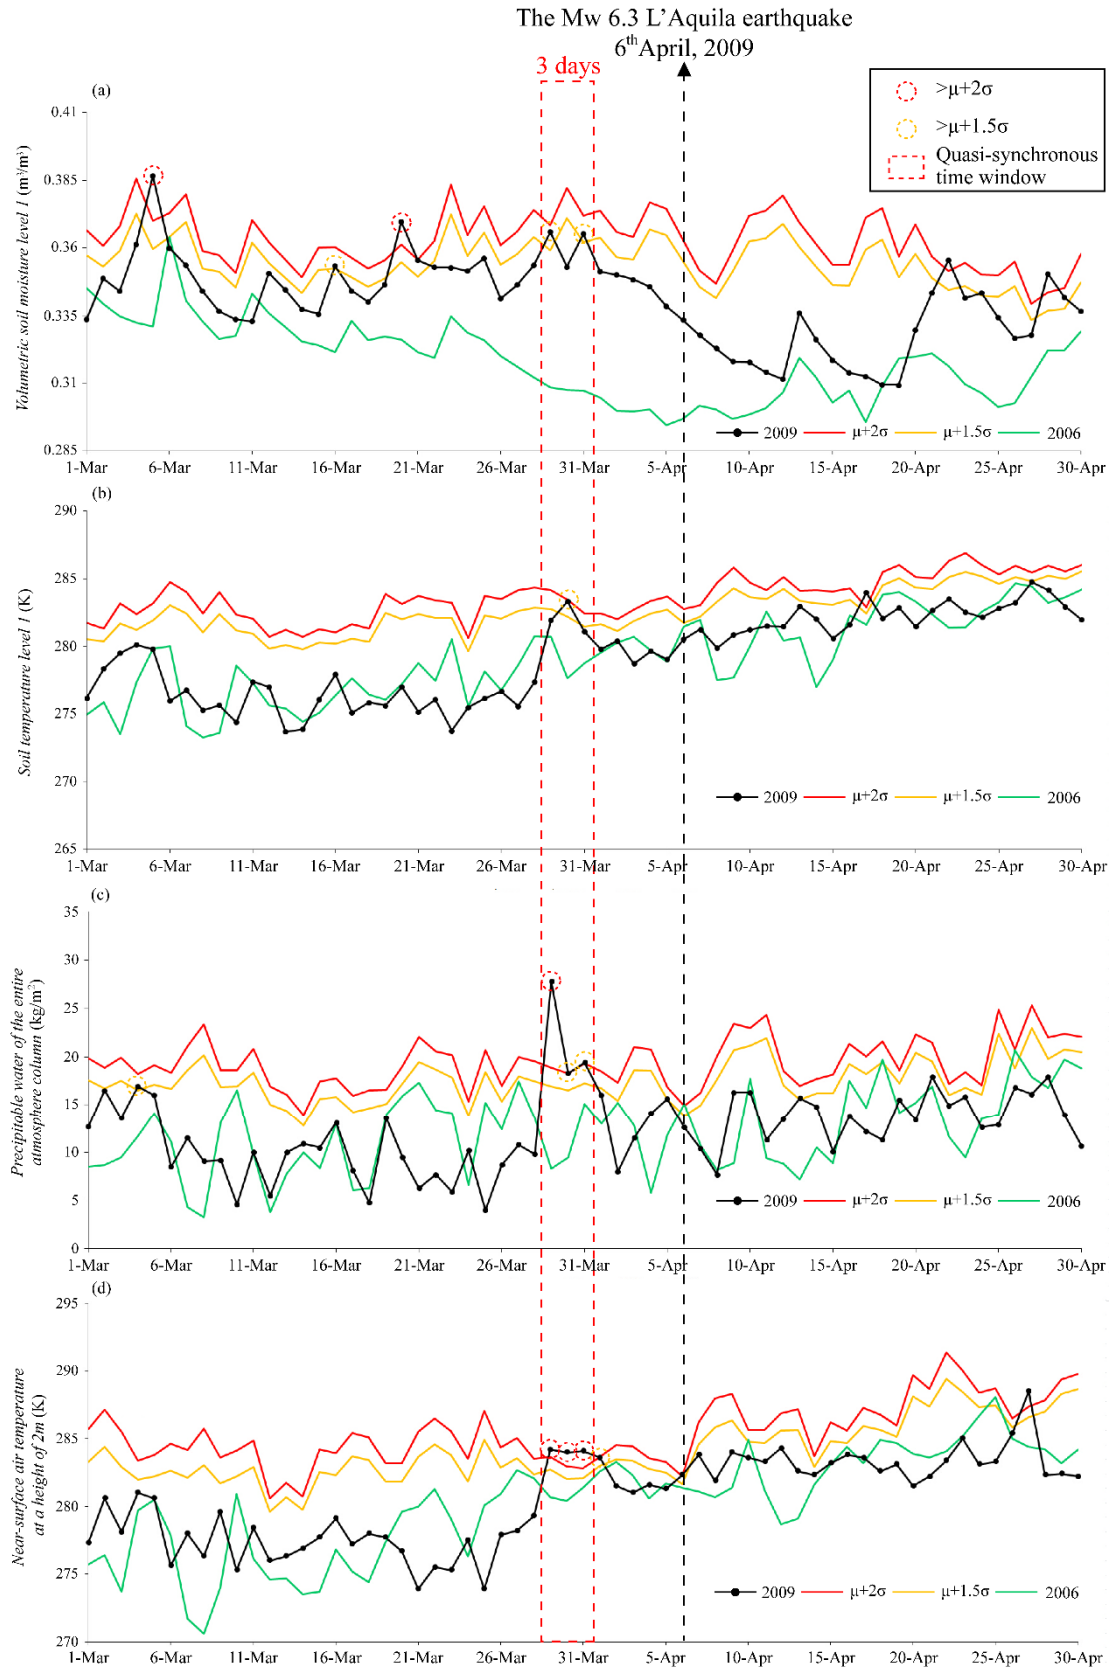

1020

1021 **Fig 2.1** Time series of four hydrothermal parameters, volumetric soil moisture level 1 (a), soil  
 1022 temperature level 1 (b), Precipitable water of the entire atmosphere column (c) and Near-surface air temperature  
 1023 at a height of 2m (d), on the epicenter pixel from March to April 2009, and its

1024 comparison with historical data over the same period. The red and orange lines show the value of  
 1025  $(\mu+2\sigma)$  and  $(\mu+1.5\sigma)$ , respectively; the green and black lines show the value in 2006 (as a normal  
 1026 background) and 2009, respectively.  
 1027

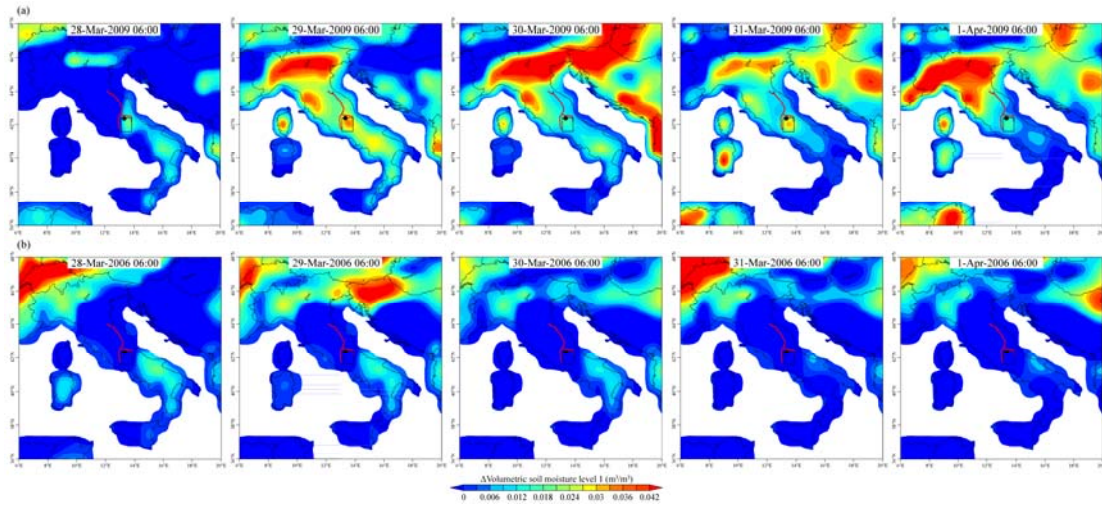

1028  
 1029 **Fig. 2.2** Spatial distributions of  $\Delta$ Volumetric soil moisture level 1 at 06:00 UTC from March 28 to  
 1030 April 1, 2009 (a) and 2006 (b), respectively. The black spot indicates the epicenter of the main shock,  
 1031 the black rectangular box indicates the epicenter pixel, and the red line indicates the related main  
 1032 fault system.  
 1033

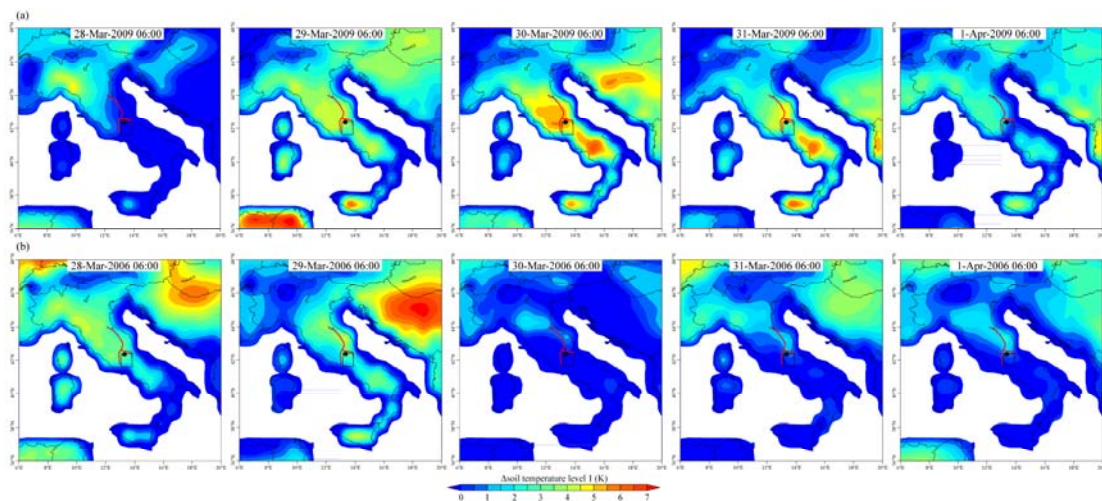

1034  
 1035 **Fig. 2.3** Spatial distributions of  $\Delta$ Soil temperature level 1 at 06:00 UTC from March 28 to April 1,  
 1036 2009 (a) and 2006 (b), respectively. The black spot indicates the epicenter of the main shock, the  
 1037 black rectangular box indicates the epicenter pixel, and the red line indicates the related main  
 1038 fault system.  
 1039

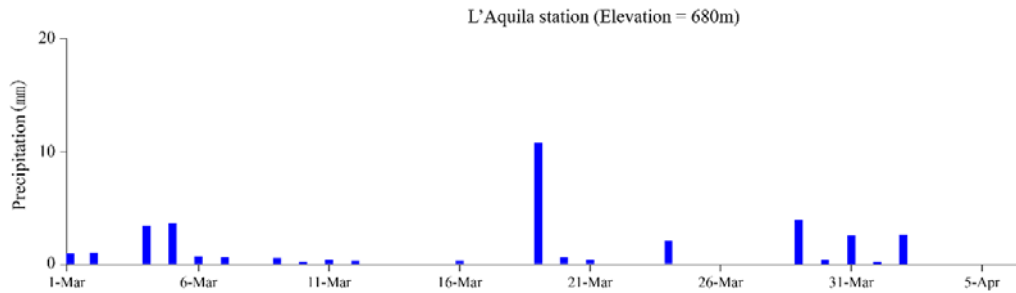

1040  
1041  
1042

**Fig. 2.4** Daily precipitation at L'Aquila station from March 1 to April 5, 2009.

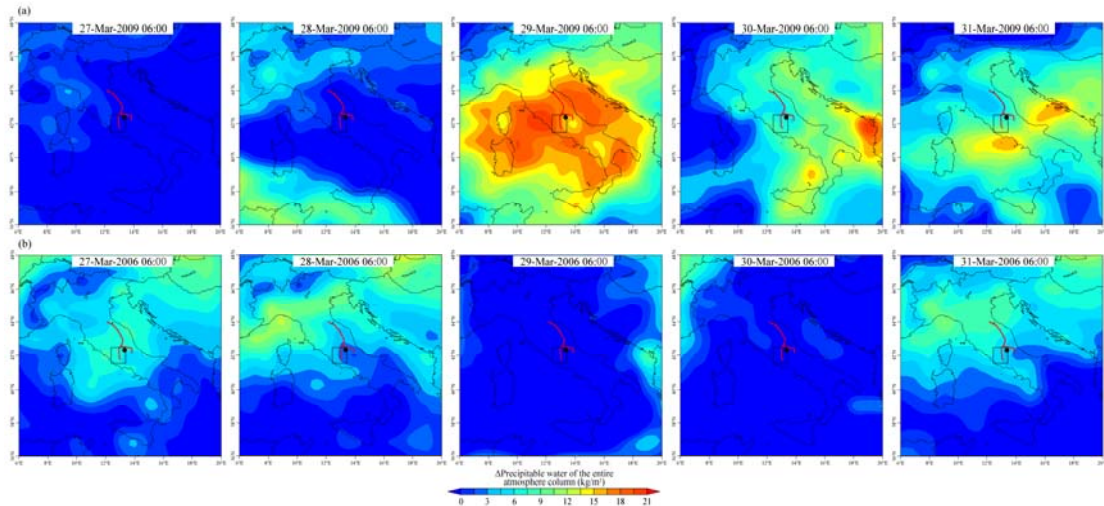

1043  
1044  
1045  
1046  
1047  
1048

**Fig. 2.5** Spatial distributions of  $\Delta$ Precipitable water of the entire atmosphere column at 06:00 UTC from March 28 to April 1, 2009 (a) and 2006 (b), respectively. The black spot indicates the epicenter of the main shock, the black rectangular box indicates the epicenter pixel, and the red line indicates the related main fault system.

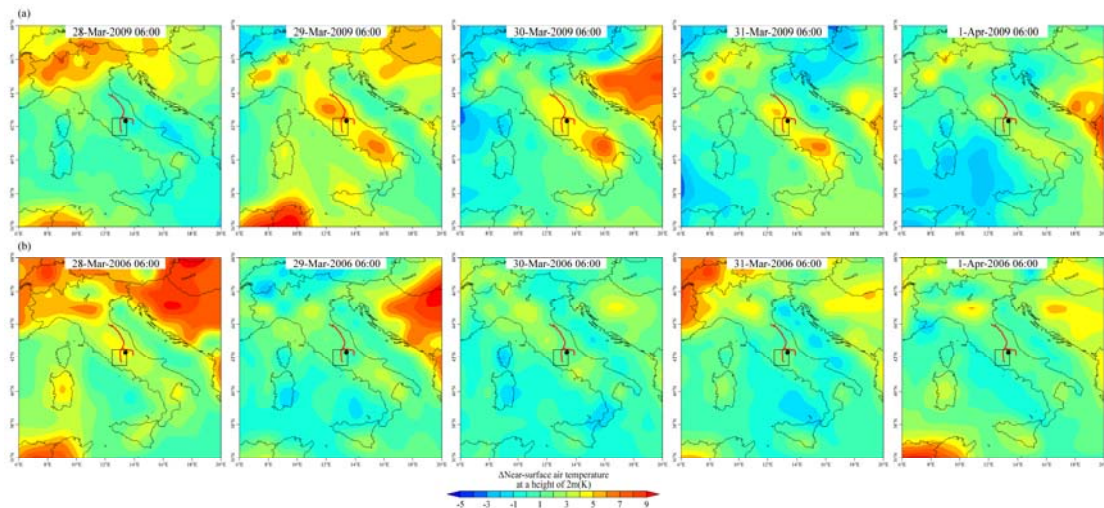

1049  
1050  
1051  
1052  
1053

**Fig. 2.6** Spatial distribution of  $\Delta$ Near-surface air temperature at a height of 2m at 06:00 UTC from March 28 to April 1, 2009 (a) and 2006 (b), respectively. The black spot indicates the epicenter of the main shock, the black rectangular box indicates the epicenter pixel, and the red line indicates the related main fault system.

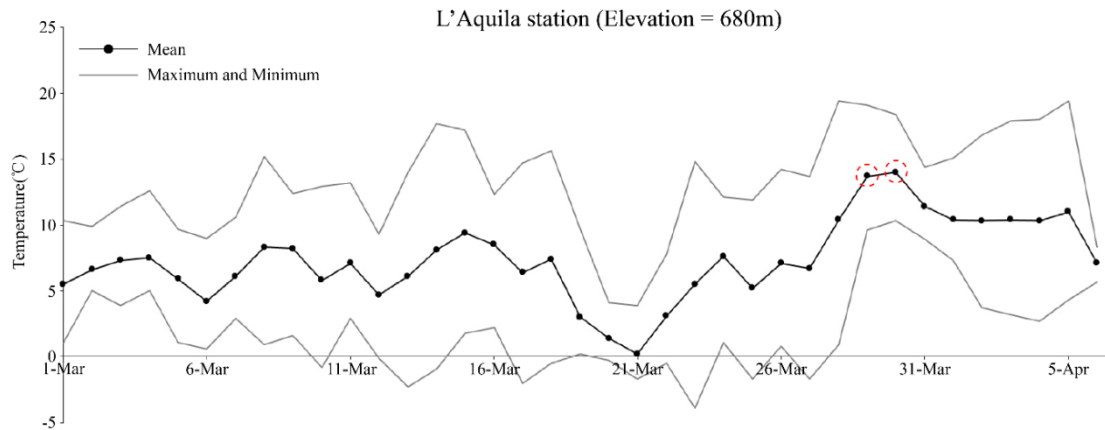

1054

1055 **Fig. 2.7** Daily average and maximum and minimum values of air temperature at the L'Aquila station  
 1056 from March 1 to April 5, 2009.

1057

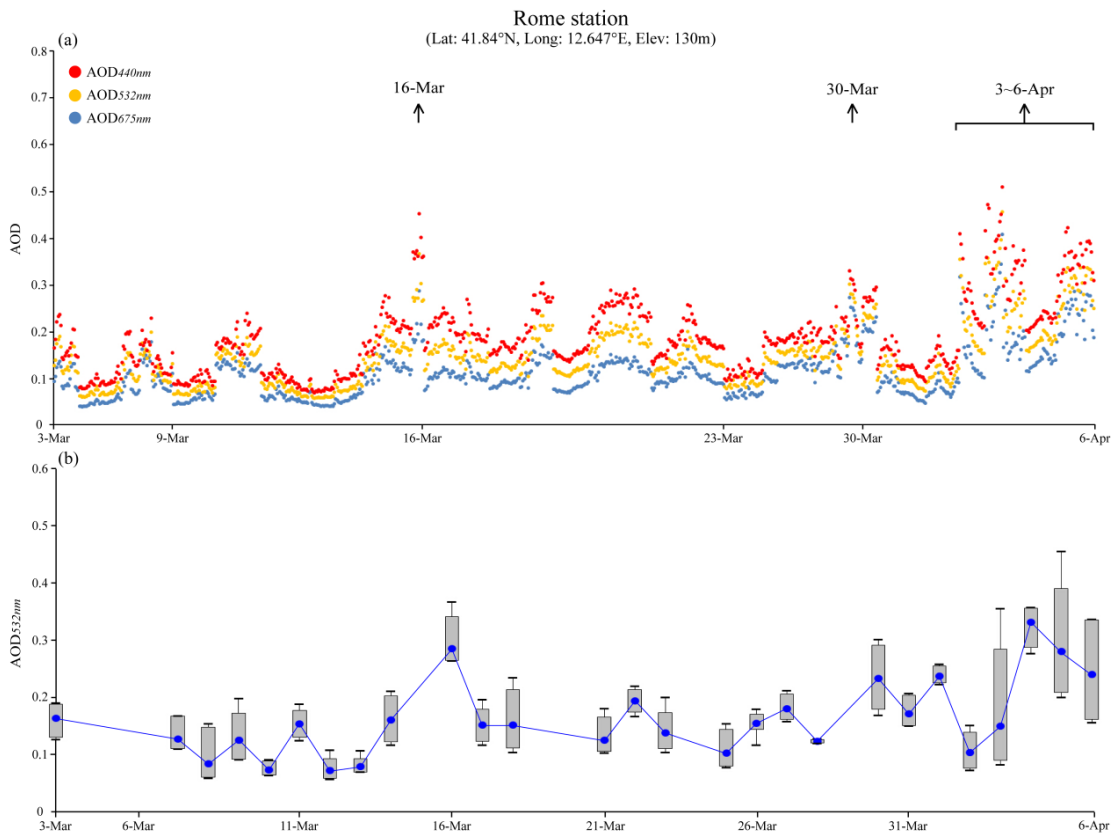

1058

1059 **Fig. 2.8** Time series of AOD at the Roma station of AERONET from March 3 to April 6, 2009. (a)  
 1060 AOD at 440, 532, and 675 nm; (b) daily average and maximum and minimum values of AOD<sub>532nm</sub>,  
 1061 as well as the 5th and 95th percentile box plots.

1062

1063



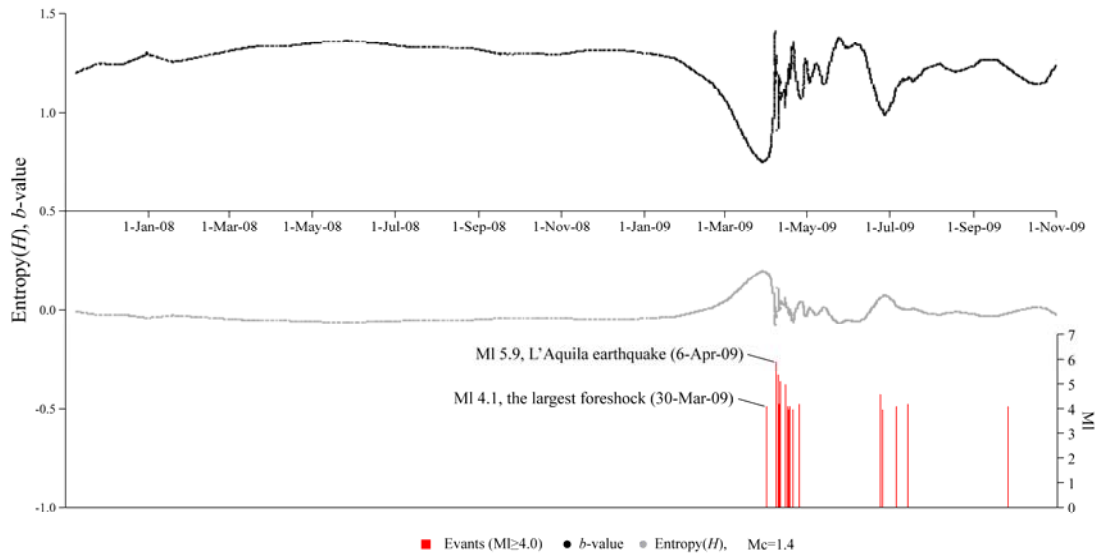

1064

1065 **Fig. 3.1** Time series of  $b$ -value (above plot), Shannon entropy ( $H$ ; intermediate plot), and seismic

1066 events ( $MI \geq 4.0$ ; bottom plot) during phases P1-2 and P2.

1067

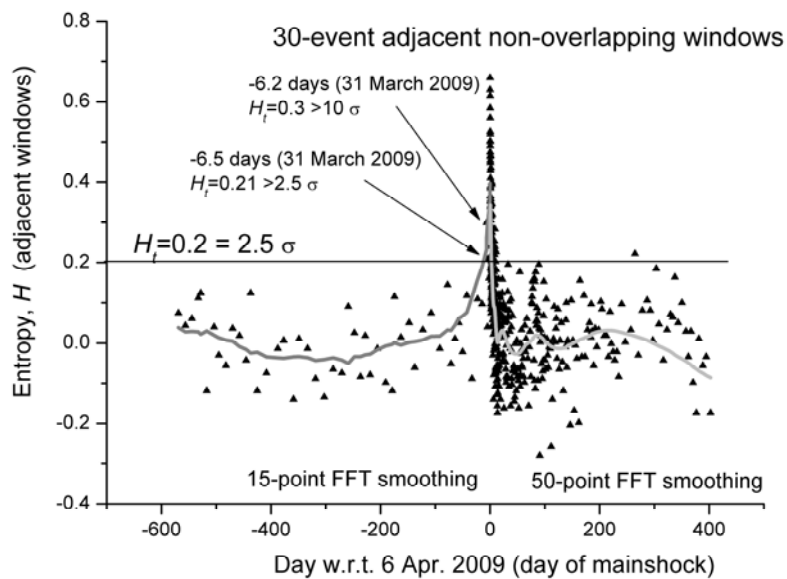

1068

1069 **Fig. 3.2** Shannon entropy for L'Aquila seismic sequence from around 1.5 year before the mainshock

1070 to around 1 year after, calculated for a circular area of 80 km around the mainshock epicenter. The

1071 gray curve defines a reasonable smoothing of the entropy values: 15-point FFT before the

1072 mainshock and 50-point FFT smoothing after the mainshock. Sigma is the standard deviation

1073 estimated over the whole interval.

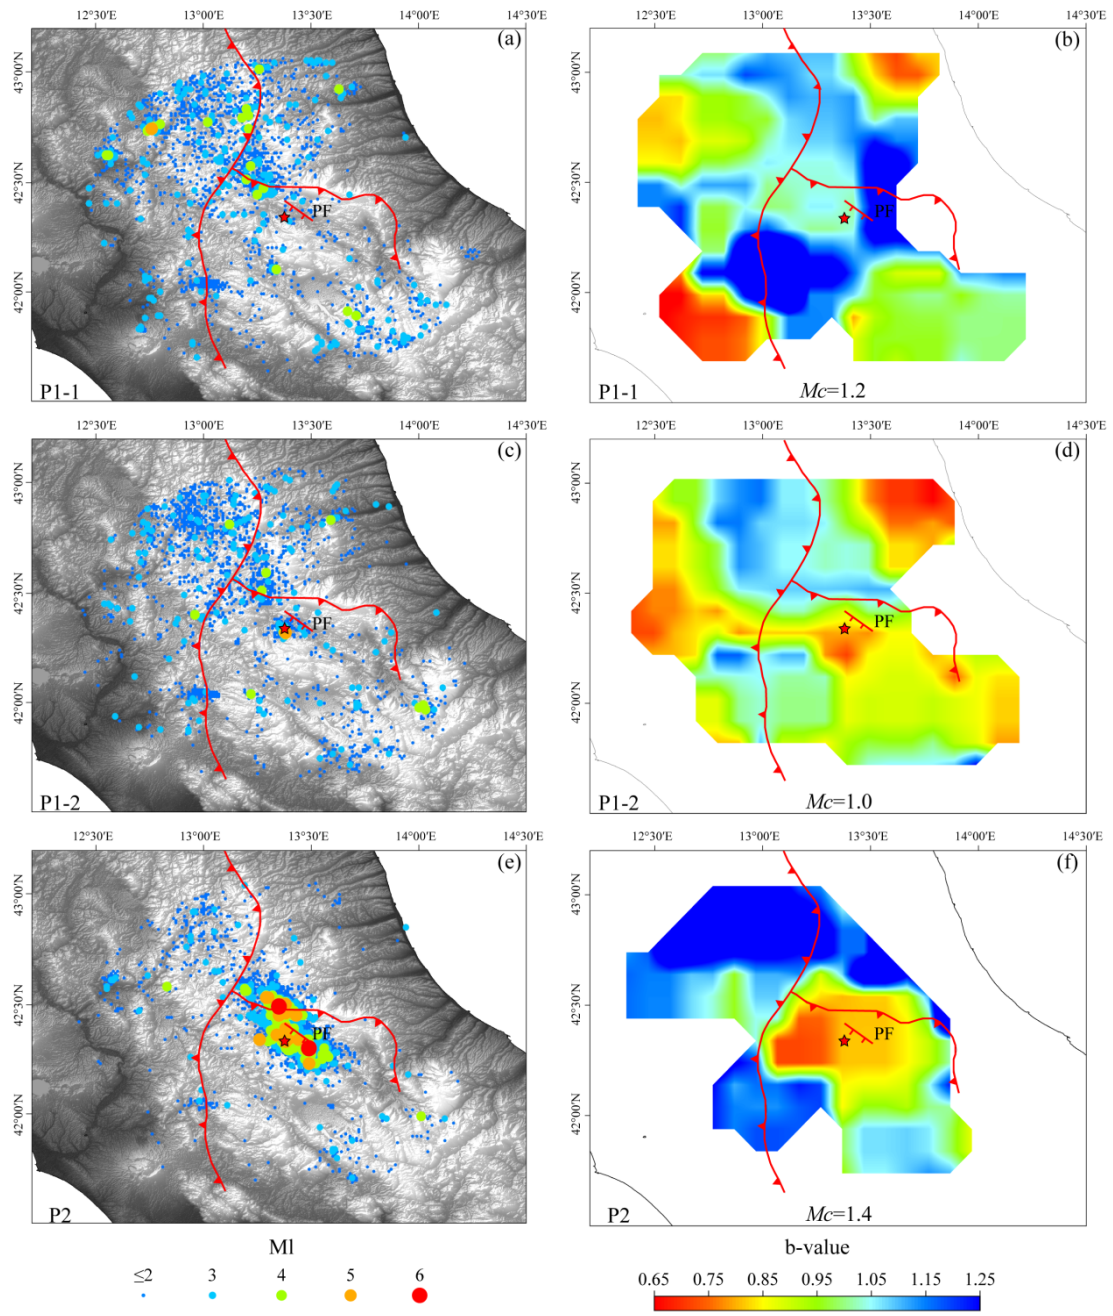

1074

1075 **Fig. 3.3** Spatial distributions of epicenters (a, c, e) and  $b$ -value (b, d, f) before and after the main  
 1076 shock of the L'Aquila earthquake at three-staged phases (the red star and the red lines represent  
 1077 the main shock and main fault system, respectively).

1078

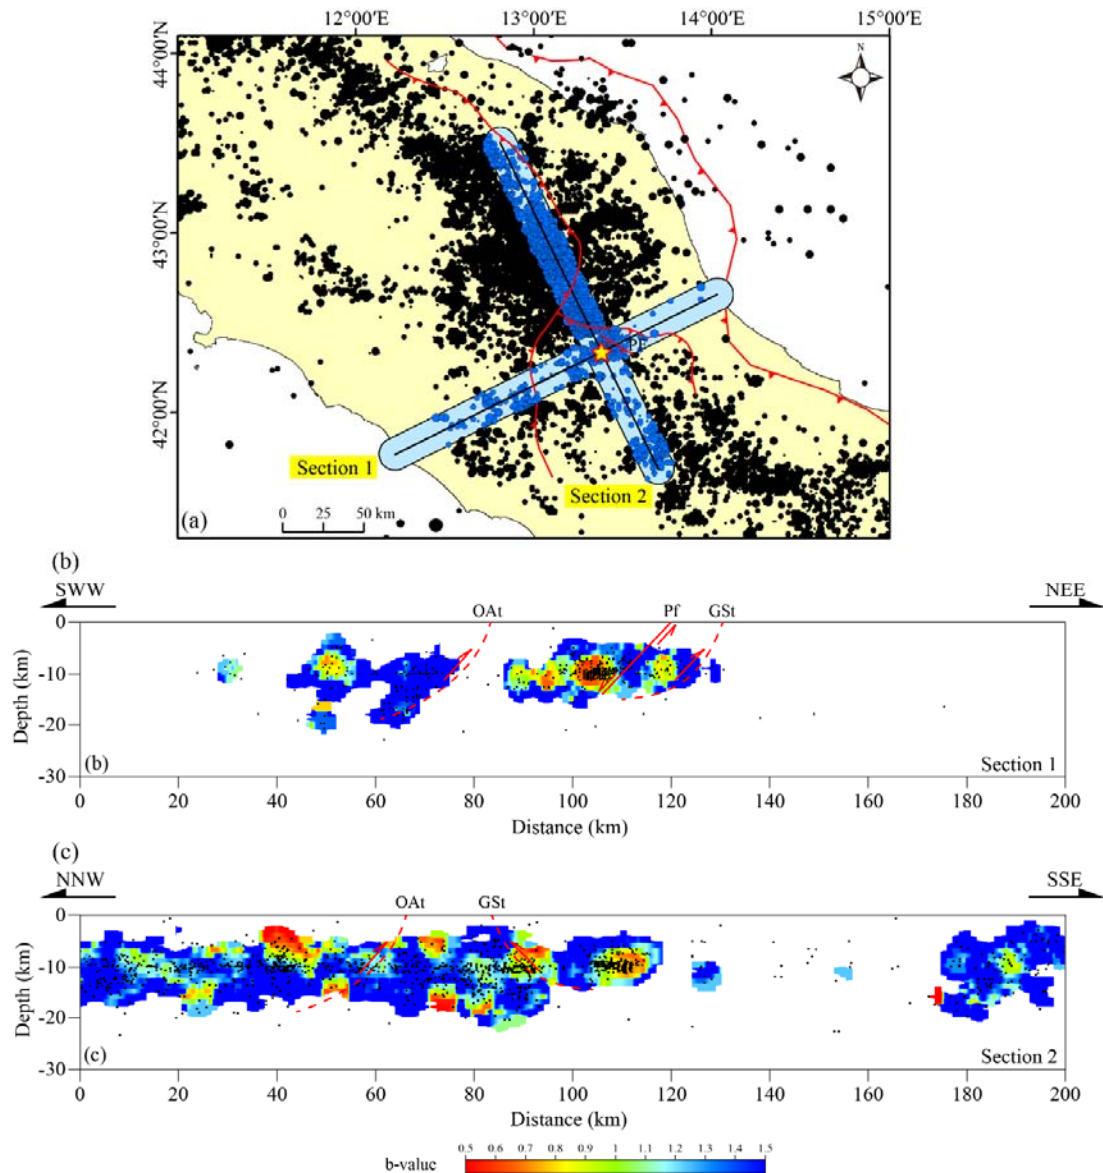

1079

1080 **Fig. 3.4** Spatial distribution of epicenters/hypocenters and  $b$ -values from P1-1 to P1-2. (a) The  
 1081 outcrops of seismic faults and thrust, as well as all the epicenters of the foreshocks and the main  
 1082 shock; (b)  $b$ -values along section 1 crossing the main shock epicenter and seismic faults and thrust  
 1083 (the black dots represent hypocenters); (c)  $b$ -values along section 2 crossing the main shock  
 1084 epicenter and seismic faults and thrust (the black dots represent hypocenters). OAt: *Olevano–*  
 1085 *Antrodoco* thrust, GSt: *Gran Sasso* thrust, Pf: *Paganica* fault.

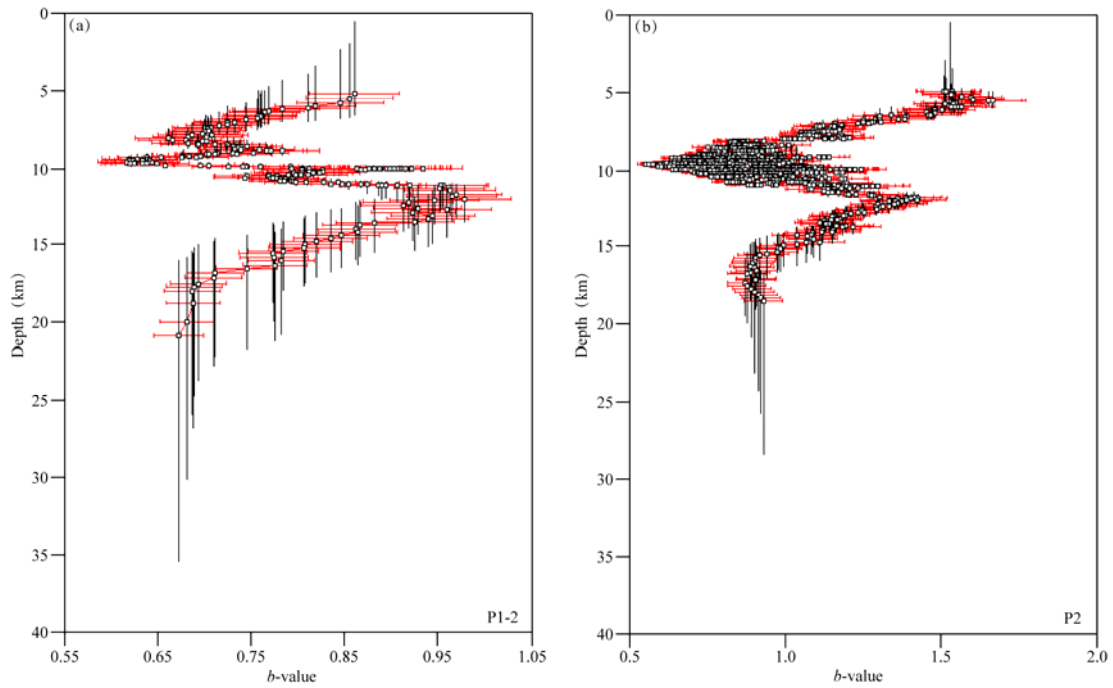

1086  
1087  
1088  
1089  
1090  
1091

**Fig. 3.5** The relation between the  $b$ -values and hypocenter depths in phase P1-2 (a) and phase P2 (b). The dots indicate the average  $b$ -values related to depth, the horizontal bars indicate the uncertainty in the  $b$ -values, and the vertical bars indicate the depth range of the sampled hypocenters.

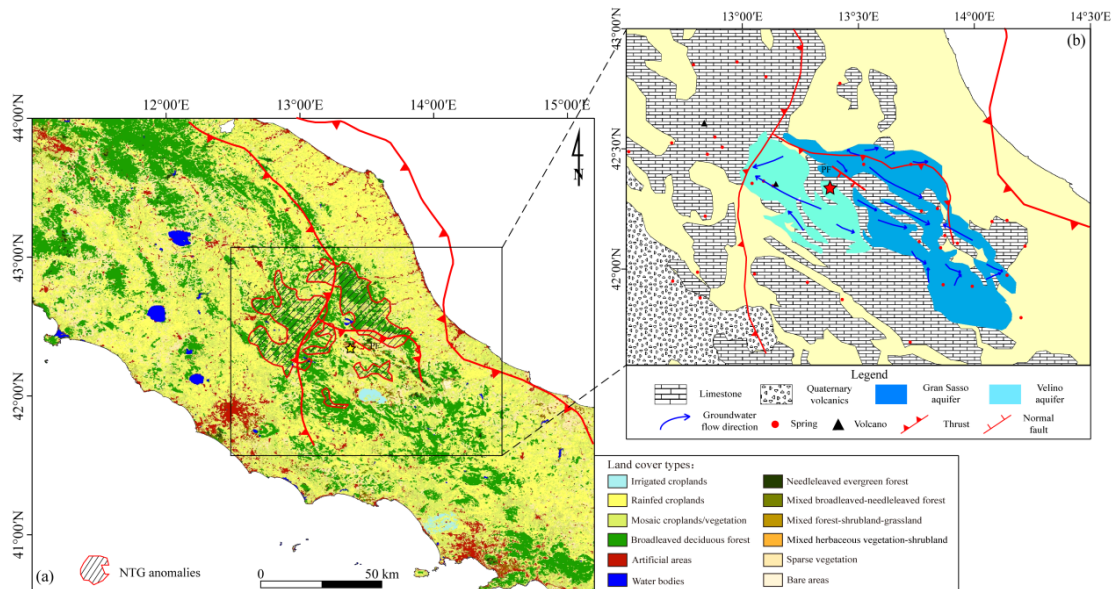

1092  
1093  
1094  
1095  
1096  
1097  
1098

**Fig. 4.1** An integrated representation of the geographical (coversphere) and geological (lithosphere) environments associated with the 2009 L'Aquila earthquake. (a) Zones of NTG anomalies from LST data overlapped by land covers (Piroddi and Ranieri, 2012); (b) the spatial distribution of tectonic faults, geological rocks, hydrogeological aquifers, and groundwater flows in the epicenter area and its surroundings (Chiodini et al., 2012).

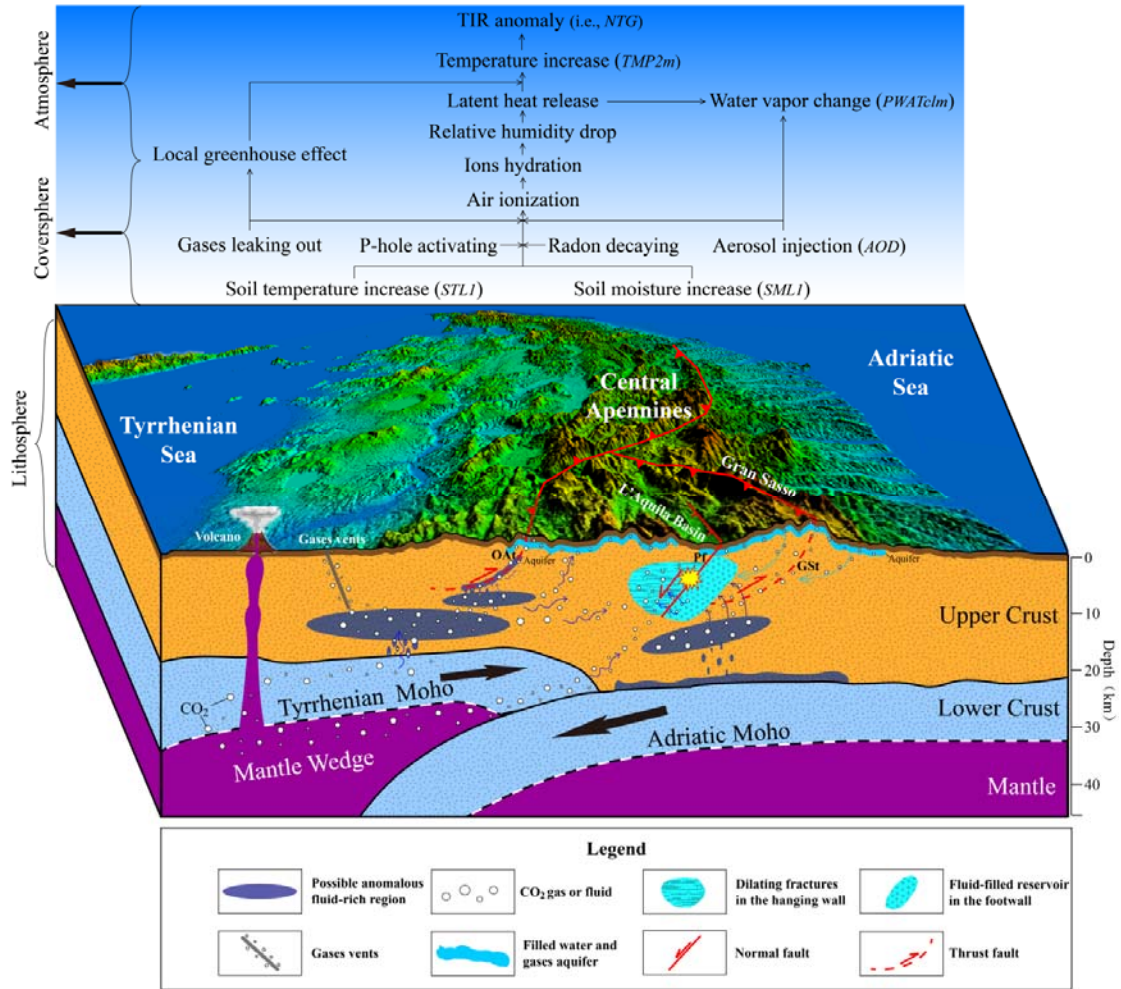

1099

1100 **Fig. 4.2** Mechanism of hydrothermal anomalies and conceptual mode of LCA coupling associated  
 1101 with the 2009 Mw 6.3 L'Aquila earthquake in Italy (referring to Chiarabba et al., 2010; Chiodini  
 1102 et al., 2004; Di Luccio et al., 2010; Lucente et al., 2010; Terakawa et al., 2010). OAt: *Olevano–*  
 1103 *Antrodoco* thrust, GS: *Gran Sasso* thrust, Pf: *Paganica* fault.
